# Supplementary material for: 4-Coordinated, 14-electron ruthenium(ii) chalcogenolate complexes: synthesis, electronic structure and reactions with PhICl2 and organic azides
Source: Royal Society of Chemistry journal article supplement (doi:10.1039/c9dt02457c), 2019-01-01
Supplement: c9dt02457c1.pdf [file c9dt02457c1.pdf]

## Supporting Information for

# 14-Electron, 4-Coordinated Ruthenium(II) Chalcogenolate Complexes: Synthesis, Electronic Structure and Reactions with $\text{PhICl}_2$ and Organic Azides

Wai-Ming Ng, Xueying Guo, Wai-Man Cheung, Yat-Ming So, Man-Chun Chong, Herman H.-Y. Sung, Ian D. Williams\*, Zhenyang Lin,\* and Wa-Hung Leung\*

*Department of Chemistry, The Hong Kong University of Science and Technology,  
Clear Water Bay, Kowloon, Hong Kong, People's Republic of China*

\*Corresponding authors, E-mail: [chwill@ust.hk](mailto:chwill@ust.hk), [chzlin@ust.hk](mailto:chzlin@ust.hk), [chleung@ust.hk](mailto:chleung@ust.hk)

## Table of Content

|                                                                                                                                      | Page no. |
|--------------------------------------------------------------------------------------------------------------------------------------|----------|
| 1. Computational comparison of complex <b>1</b> , <b>1<sub>Mes</sub></b> and <b>2</b>                                                | 3-35     |
| 2. NMR spectra                                                                                                                       | 36-55    |
| 3. FT-IR spectrum of <b>4</b>                                                                                                        | 56       |
| 4. Preliminary crystal structure of <b>3</b>                                                                                         | 57       |
| 5. Preliminary crystal structure of <b>5</b>                                                                                         | 58       |
| 6. Crystallographic data and experimental details for <b>2</b> , <b>4</b> , <b>6</b> , <b>8</b> , <b>9</b> , <b>10</b> and <b>11</b> | 59       |

### Computational comparison of complex **1**, **1<sub>Mes</sub>** and **2**.

Structural differences between **1** and **1<sub>Mes</sub>** have been disclosed as shown below. Calculation results indicate that the structure did not change much with the replacement of R.

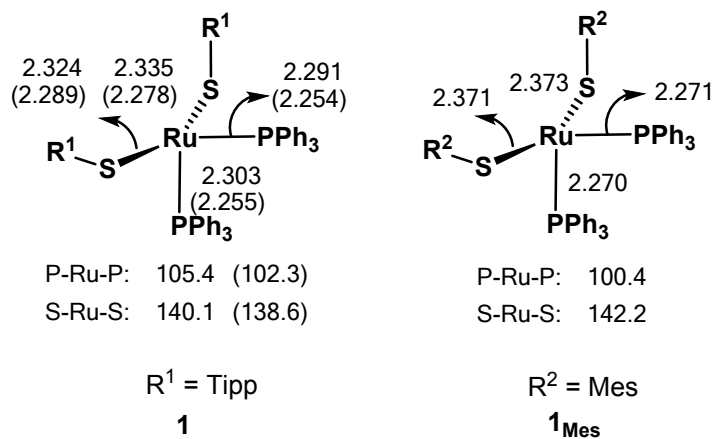

**Fig. S1** Comparison of selected bond distances (Å) and angles (°) in calculated structures of **1** and **1<sub>Mes</sub>**.

The orbital plots of the two donor-acceptor interactions in the selenolate complex **2** and simplified complex **1<sub>Mes</sub>** are shown below. The second-order perturbation interaction energies of **2** are calculated to be 13.6 and 11.0 kcal/mol. The corresponding interaction energies for **1<sub>Mes</sub>** are

12.8 and 10.4 kcal/mol.

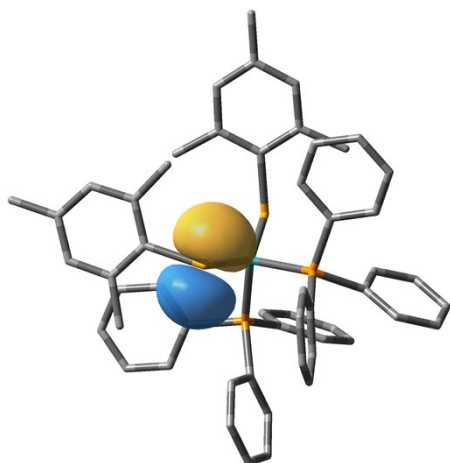

a **Se(p)**-lone-pair orbital  
(donor orbital)

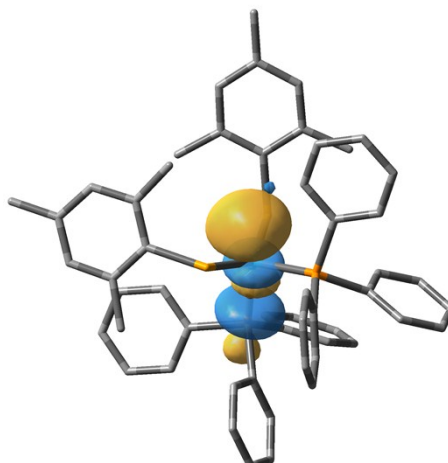

a **Ru-P** antibonding orbital  
(acceptor orbital)

**The first pair of  $n \rightarrow \sigma^*$  (donor-acceptor) orbital interaction**

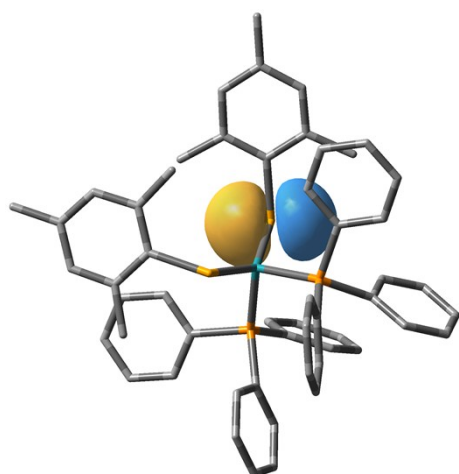

a **Se(p)**-lone-pair orbital  
(donor orbital)

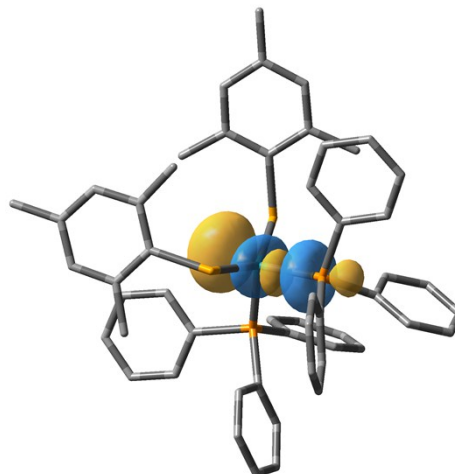

a **Ru-P** antibonding orbital  
(acceptor orbital)

**The first pair of  $n \rightarrow \sigma^*$  (donor-acceptor) orbital interaction**

**(a)**

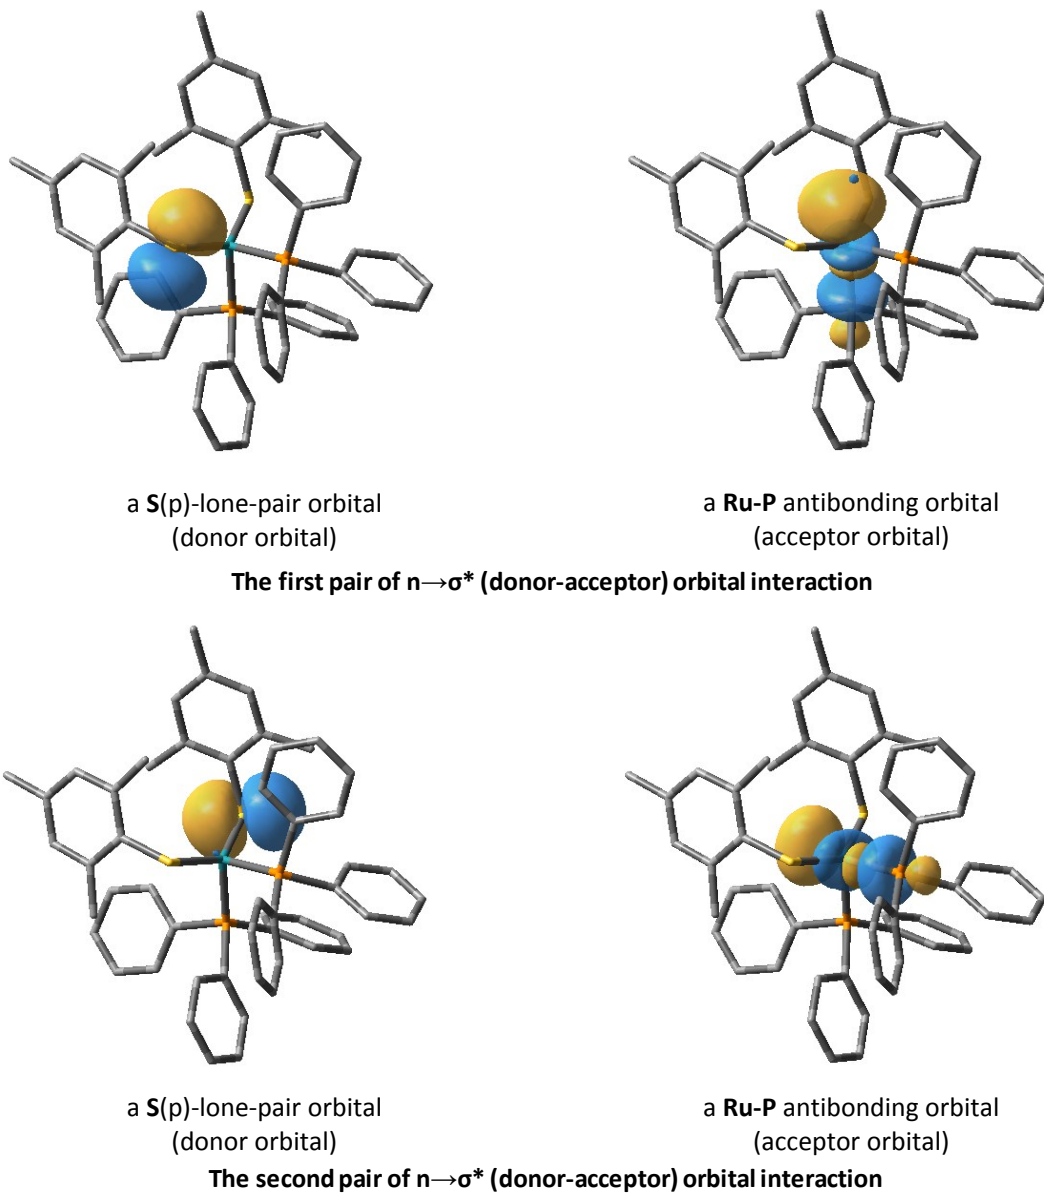

**(b)**

**Fig. S2** Plots of the orbitals with an isovalue of 0.045 1/bohr<sup>3/2</sup> showing the  $n \rightarrow \sigma^*$  (donor-acceptor)  $\pi$ -orbital interactions in **(a)** complex **2** **(b)** complex **1<sub>Mes</sub>**. All hydrogen atoms are omitted for clarity.

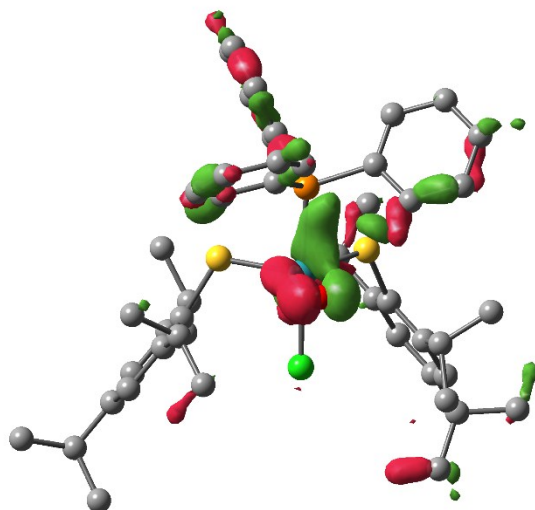

**Fig. S3** Plot of the Ru-O  $\pi$ -bonding orbital in **4**. (isovalue=0.040 1/bohr<sup>3/2</sup>)

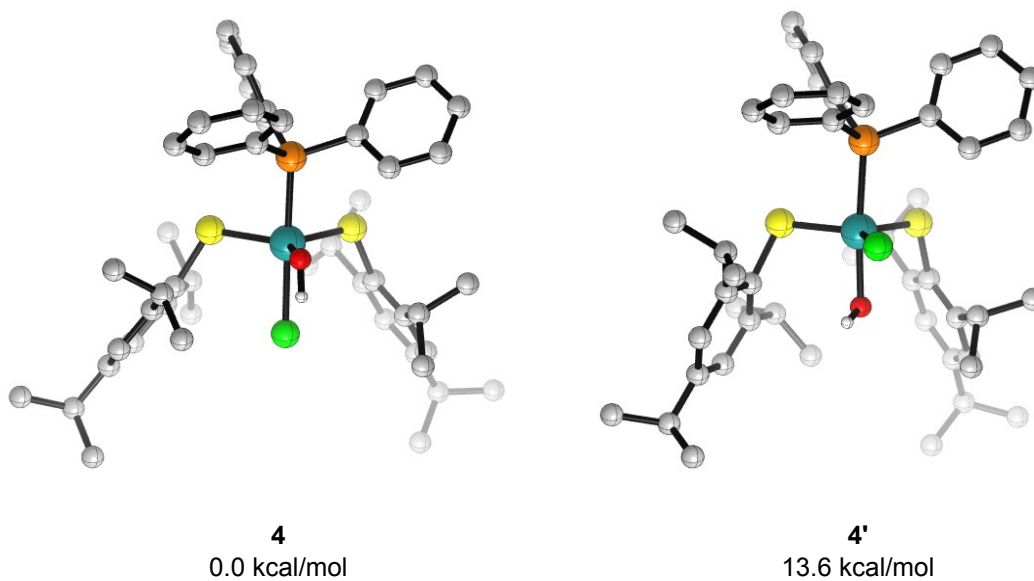

**Fig. S4** Optimized structures of **4** and its geometric isomer **4'**. All the hydrogen atoms except for the one of hydroxide are omitted for clarity.

### Cartesian Coordinates

complex **1**

|    |              |              |              |
|----|--------------|--------------|--------------|
| 44 | 0.448804000  | 0.048112000  | -0.065381000 |
| 16 | 0.013463000  | -0.892414000 | -2.157469000 |
| 6  | -1.464814000 | -1.857845000 | -1.808922000 |
| 6  | -2.731788000 | -1.236002000 | -1.917405000 |
| 6  | -3.864504000 | -1.998350000 | -1.631884000 |
| 6  | -3.791586000 | -3.331933000 | -1.238374000 |
| 6  | -2.534661000 | -3.933368000 | -1.187842000 |
| 6  | -1.366886000 | -3.231064000 | -1.479682000 |
| 6  | -2.877752000 | 0.196645000  | -2.395640000 |
| 6  | -4.209782000 | 0.853642000  | -2.062894000 |

|    |              |              |              |
|----|--------------|--------------|--------------|
| 6  | -2.644524000 | 0.280260000  | -3.905965000 |
| 6  | -0.026965000 | -3.936704000 | -1.479018000 |
| 6  | 0.044580000  | -5.201107000 | -0.633257000 |
| 6  | 0.409033000  | -4.254431000 | -2.910637000 |
| 16 | -0.668164000 | 0.683997000  | 1.870894000  |
| 6  | -2.067626000 | 1.740358000  | 1.460941000  |
| 6  | -3.367113000 | 1.177096000  | 1.524770000  |
| 6  | -4.460705000 | 2.015888000  | 1.311900000  |
| 6  | -4.318459000 | 3.367957000  | 1.003101000  |
| 6  | -3.031314000 | 3.892263000  | 0.946377000  |
| 6  | -1.898047000 | 3.118411000  | 1.201502000  |
| 6  | -3.588182000 | -0.288056000 | 1.864871000  |
| 6  | -4.957241000 | -0.831364000 | 1.471371000  |
| 6  | -3.387275000 | -0.534175000 | 3.364033000  |
| 6  | -0.538729000 | 3.779753000  | 1.302794000  |
| 6  | -0.395821000 | 5.080550000  | 0.521727000  |
| 6  | -0.194649000 | 4.029069000  | 2.773364000  |
| 15 | 1.720776000  | -1.240017000 | 1.338896000  |
| 6  | 0.640120000  | -2.282029000 | 2.435467000  |
| 6  | -0.547859000 | -2.767319000 | 1.878829000  |
| 6  | -1.427920000 | -3.529245000 | 2.635639000  |
| 6  | -1.136629000 | -3.812192000 | 3.967763000  |
| 6  | 0.045358000  | -3.341340000 | 4.528693000  |
| 6  | 0.932231000  | -2.582659000 | 3.767321000  |
| 6  | 2.792812000  | -2.532016000 | 0.543621000  |
| 6  | 3.063639000  | -2.512523000 | -0.823007000 |
| 6  | 3.875478000  | -3.489979000 | -1.394878000 |
| 6  | 4.424594000  | -4.491613000 | -0.603073000 |
| 6  | 4.156276000  | -4.519745000 | 0.764641000  |
| 6  | 3.342731000  | -3.548954000 | 1.334578000  |
| 6  | 2.906136000  | -0.437739000 | 2.514028000  |
| 6  | 2.428392000  | 0.285543000  | 3.615947000  |
| 6  | 3.311191000  | 0.975882000  | 4.438381000  |
| 6  | 4.677435000  | 0.970335000  | 4.163825000  |
| 6  | 5.156850000  | 0.269757000  | 3.062779000  |
| 6  | 4.277462000  | -0.434287000 | 2.244389000  |
| 15 | 1.947215000  | 1.385270000  | -1.191713000 |
| 6  | 1.031802000  | 2.401336000  | -2.447955000 |
| 6  | -0.276865000 | 2.777482000  | -2.128023000 |
| 6  | -1.032144000 | 3.546740000  | -3.004270000 |
| 6  | -0.490277000 | 3.944519000  | -4.223697000 |
| 6  | 0.812068000  | 3.581328000  | -4.549769000 |
| 6  | 1.572927000  | 2.819559000  | -3.665994000 |
| 6  | 2.790255000  | 2.709074000  | -0.200714000 |
| 6  | 2.713267000  | 2.711925000  | 1.188880000  |
| 6  | 3.353610000  | 3.702966000  | 1.929941000  |
| 6  | 4.065591000  | 4.705224000  | 1.282002000  |
| 6  | 4.139145000  | 4.714993000  | -0.110532000 |
| 6  | 3.507678000  | 3.722290000  | -0.848246000 |

|   |               |               |               |
|---|---------------|---------------|---------------|
| 6 | 3. 371685000  | 0. 661416000  | -2. 120785000 |
| 6 | 3. 180864000  | 0. 024204000  | -3. 353776000 |
| 6 | 4. 233511000  | -0. 646949000 | -3. 967153000 |
| 6 | 5. 482843000  | -0. 703363000 | -3. 354065000 |
| 6 | 5. 677437000  | -0. 082520000 | -2. 124063000 |
| 6 | 4. 629373000  | 0. 596365000  | -1. 511349000 |
| 1 | -4. 850180000 | -1. 537476000 | -1. 711163000 |
| 1 | -2. 459702000 | -4. 987643000 | -0. 916255000 |
| 1 | -2. 092451000 | 0. 788665000  | -1. 899764000 |
| 1 | -4. 161641000 | 1. 917832000  | -2. 334875000 |
| 1 | -5. 043854000 | 0. 414396000  | -2. 631171000 |
| 1 | -4. 447405000 | 0. 802550000  | -0. 993155000 |
| 1 | -2. 737243000 | 1. 320327000  | -4. 250228000 |
| 1 | -3. 395393000 | -0. 323412000 | -4. 437838000 |
| 1 | -1. 647852000 | -0. 079984000 | -4. 188658000 |
| 1 | 0. 705831000  | -3. 231149000 | -1. 066145000 |
| 1 | 1. 091307000  | -5. 529930000 | -0. 569780000 |
| 1 | -0. 530401000 | -6. 028491000 | -1. 075833000 |
| 1 | -0. 317124000 | -5. 043701000 | 0. 391926000  |
| 1 | 1. 415509000  | -4. 698436000 | -2. 910854000 |
| 1 | 0. 432797000  | -3. 353507000 | -3. 537173000 |
| 1 | -0. 283934000 | -4. 975100000 | -3. 370284000 |
| 1 | -5. 464587000 | 1. 592168000  | 1. 361589000  |
| 1 | -2. 911424000 | 4. 955017000  | 0. 727870000  |
| 1 | -2. 830321000 | -0. 870885000 | 1. 310583000  |
| 1 | -4. 963773000 | -1. 923058000 | 1. 604114000  |
| 1 | -5. 211860000 | -0. 625496000 | 0. 423647000  |
| 1 | -5. 757966000 | -0. 424850000 | 2. 107031000  |
| 1 | -3. 563014000 | -1. 592488000 | 3. 605836000  |
| 1 | -2. 373333000 | -0. 279234000 | 3. 696703000  |
| 1 | -4. 104601000 | 0. 069434000  | 3. 940507000  |
| 1 | 0. 204703000  | 3. 072498000  | 0. 907863000  |
| 1 | 0. 661477000  | 5. 381216000  | 0. 497628000  |
| 1 | -0. 954425000 | 5. 904130000  | 0. 991066000  |
| 1 | -0. 738359000 | 4. 986142000  | -0. 517240000 |
| 1 | 0. 787880000  | 4. 515727000  | 2. 858985000  |
| 1 | -0. 944019000 | 4. 691678000  | 3. 231513000  |
| 1 | -0. 166826000 | 3. 093344000  | 3. 348766000  |
| 1 | -0. 804661000 | -2. 533832000 | 0. 844064000  |
| 1 | -2. 354449000 | -3. 883250000 | 2. 179594000  |
| 1 | -1. 831259000 | -4. 396815000 | 4. 569022000  |
| 1 | 0. 280900000  | -3. 558521000 | 5. 569565000  |
| 1 | 1. 848914000  | -2. 212514000 | 4. 225786000  |
| 1 | 2. 614312000  | -1. 743105000 | -1. 449270000 |
| 1 | 4. 077513000  | -3. 451981000 | -2. 464815000 |
| 1 | 5. 060865000  | -5. 255060000 | -1. 048451000 |
| 1 | 4. 577929000  | -5. 305456000 | 1. 389583000  |
| 1 | 3. 132655000  | -3. 583190000 | 2. 403861000  |
| 1 | 1. 357556000  | 0. 324437000  | 3. 820763000  |



|                  |               |               |               |
|------------------|---------------|---------------|---------------|
| 1                | 2. 927459000  | 1. 525071000  | 5. 297190000  |
| 1                | 5. 365948000  | 1. 516427000  | 4. 806800000  |
| 1                | 6. 222676000  | 0. 263332000  | 2. 839780000  |
| 1                | 4. 661851000  | -0. 990535000 | 1. 389106000  |
| 1                | -0. 720968000 | 2. 460114000  | -1. 181574000 |
| 1                | -2. 049366000 | 3. 828046000  | -2. 727636000 |
| 1                | -1. 082517000 | 4. 537719000  | -4. 918568000 |
| 1                | 1. 243060000  | 3. 891280000  | -5. 500633000 |
| 1                | 2. 590783000  | 2. 541720000  | -3. 939670000 |
| 1                | 2. 131320000  | 1. 940473000  | 1. 690576000  |
| 1                | 3. 289224000  | 3. 682140000  | 3. 017805000  |
| 1                | 4. 563041000  | 5. 484201000  | 1. 857903000  |
| 1                | 4. 689786000  | 5. 501971000  | -0. 623623000 |
| 1                | 3. 573034000  | 3. 735583000  | -1. 936376000 |
| 1                | 2. 202430000  | 0. 045270000  | -3. 832768000 |
| 1                | 4. 074829000  | -1. 128532000 | -4. 930996000 |
| 1                | 6. 304627000  | -1. 230181000 | -3. 836734000 |
| 1                | 6. 651139000  | -0. 124445000 | -1. 638285000 |
| 1                | 4. 787197000  | 1. 080265000  | -0. 546077000 |
| 6                | -4. 974915000 | -4. 859226000 | 0. 394214000  |
| 6                | -5. 052235000 | -4. 107688000 | -0. 931526000 |
| 1                | -5. 872034000 | -3. 373424000 | -0. 851058000 |
| 1                | -4. 745551000 | -4. 181148000 | 1. 228256000  |
| 1                | -5. 928781000 | -5. 357688000 | 0. 613978000  |
| 1                | -4. 197522000 | -5. 636267000 | 0. 371508000  |
| 6                | -5. 389598000 | -5. 065453000 | -2. 073460000 |
| 1                | -5. 479652000 | -4. 530789000 | -3. 027838000 |
| 1                | -4. 601806000 | -5. 823793000 | -2. 191169000 |
| 1                | -6. 335370000 | -5. 591474000 | -1. 882449000 |
| 6                | -6. 583923000 | 4. 160361000  | 1. 797250000  |
| 6                | -5. 517287000 | 4. 240317000  | 0. 708913000  |
| 1                | -5. 157908000 | 5. 282408000  | 0. 667361000  |
| 1                | -6. 166381000 | 4. 386738000  | 2. 786567000  |
| 1                | -7. 397219000 | 4. 870994000  | 1. 596304000  |
| 1                | -7. 031958000 | 3. 157873000  | 1. 846238000  |
| 6                | -6. 115039000 | 3. 901880000  | -0. 656308000 |
| 1                | -5. 365757000 | 3. 999331000  | -1. 453710000 |
| 1                | -6. 486043000 | 2. 866243000  | -0. 674581000 |
| 1                | -6. 959250000 | 4. 564090000  | -0. 894423000 |
| <b>complex 2</b> |               |               |               |
| 44               | 0. 093899000  | 0. 007752000  | -0. 006984000 |
| 34               | 0. 896376000  | 0. 262509000  | 2. 329524000  |
| 34               | 0. 836017000  | -0. 266483000 | -2. 361522000 |
| 15               | -1. 321734000 | -1. 608267000 | 0. 710544000  |
| 15               | -1. 338217000 | 1. 618230000  | -0. 702214000 |
| 6                | 2. 516425000  | 1. 262036000  | 1. 929829000  |
| 6                | 3. 726630000  | 0. 564833000  | 1. 710626000  |
| 6                | 4. 877796000  | 1. 292197000  | 1. 418495000  |
| 1                | 5. 810664000  | 0. 750454000  | 1. 240645000  |
| 6                | 4. 874326000  | 2. 683291000  | 1. 325263000  |

|   |               |               |               |
|---|---------------|---------------|---------------|
| 6 | 3. 682122000  | 3. 350833000  | 1. 583283000  |
| 1 | 3. 661753000  | 4. 442708000  | 1. 543529000  |
| 6 | 2. 505129000  | 2. 670533000  | 1. 907344000  |
| 6 | 3. 820067000  | -0. 930980000 | 1. 777771000  |
| 1 | 3. 367338000  | -1. 329682000 | 2. 695800000  |
| 1 | 4. 868189000  | -1. 256380000 | 1. 735069000  |
| 1 | 3. 301670000  | -1. 399377000 | 0. 928028000  |
| 6 | 6. 127561000  | 3. 425643000  | 0. 970371000  |
| 1 | 5. 947490000  | 4. 504259000  | 0. 884630000  |
| 1 | 6. 541513000  | 3. 077818000  | 0. 012995000  |
| 1 | 6. 912119000  | 3. 278461000  | 1. 725965000  |
| 6 | 1. 281357000  | 3. 464316000  | 2. 246215000  |
| 1 | 0. 473171000  | 3. 298210000  | 1. 521973000  |
| 1 | 1. 501363000  | 4. 539292000  | 2. 252268000  |
| 1 | 0. 886439000  | 3. 183512000  | 3. 232861000  |
| 6 | 2. 454145000  | -1. 274342000 | -1. 977539000 |
| 6 | 2. 439139000  | -2. 683462000 | -1. 973254000 |
| 6 | 3. 611973000  | -3. 369963000 | -1. 648333000 |
| 1 | 3. 588446000  | -4. 462211000 | -1. 621089000 |
| 6 | 4. 803336000  | -2. 708331000 | -1. 371052000 |
| 6 | 4. 813749000  | -1. 317198000 | -1. 458099000 |
| 1 | 5. 748047000  | -0. 780289000 | -1. 273192000 |
| 6 | 3. 666369000  | -0. 583393000 | -1. 749700000 |
| 6 | 1. 217444000  | -3. 472791000 | -2. 332435000 |
| 1 | 0. 428274000  | -3. 378990000 | -1. 573563000 |
| 1 | 1. 456454000  | -4. 539618000 | -2. 427069000 |
| 1 | 0. 787724000  | -3. 127671000 | -3. 283128000 |
| 6 | 6. 041663000  | -3. 456968000 | -0. 980371000 |
| 1 | 6. 914101000  | -3. 131603000 | -1. 563113000 |
| 1 | 5. 923628000  | -4. 537965000 | -1. 124964000 |
| 1 | 6. 287764000  | -3. 290235000 | 0. 079001000  |
| 6 | 3. 768120000  | 0. 912157000  | -1. 809742000 |
| 1 | 3. 309785000  | 1. 317413000  | -2. 722047000 |
| 1 | 4. 818560000  | 1. 230246000  | -1. 776298000 |
| 1 | 3. 261187000  | 1. 380822000  | -0. 953016000 |
| 6 | -2. 227855000 | 1. 499596000  | -2. 323219000 |
| 6 | -3. 365244000 | 0. 695217000  | -2. 460997000 |
| 1 | -3. 776559000 | 0. 174644000  | -1. 594807000 |
| 6 | -3. 989234000 | 0. 559584000  | -3. 695882000 |
| 1 | -4. 880171000 | -0. 061444000 | -3. 780189000 |
| 6 | -3. 471610000 | 1. 204012000  | -4. 815548000 |
| 1 | -3. 957004000 | 1. 092053000  | -5. 783893000 |
| 6 | -2. 329753000 | 1. 988374000  | -4. 693513000 |
| 1 | -1. 915279000 | 2. 491842000  | -5. 565335000 |
| 6 | -1. 713329000 | 2. 140052000  | -3. 455779000 |
| 1 | -0. 825479000 | 2. 765398000  | -3. 370950000 |
| 6 | -0. 434244000 | 3. 241503000  | -0. 870074000 |
| 6 | -1. 090592000 | 4. 457086000  | -0. 640880000 |
| 1 | -2. 151460000 | 4. 469429000  | -0. 392857000 |

|   |              |              |              |
|---|--------------|--------------|--------------|
| 6 | -0.389075000 | 5.655275000  | -0.704623000 |
| 1 | -0.909373000 | 6.593659000  | -0.517999000 |
| 6 | 0.973687000  | 5.658728000  | -0.994992000 |
| 1 | 1.521410000  | 6.599470000  | -1.028413000 |
| 6 | 1.628308000  | 4.457644000  | -1.242820000 |
| 1 | 2.694790000  | 4.440164000  | -1.467176000 |
| 6 | 0.925383000  | 3.258115000  | -1.186223000 |
| 1 | 1.435096000  | 2.318102000  | -1.387960000 |
| 6 | -2.665970000 | 2.125661000  | 0.496154000  |
| 6 | -2.309320000 | 2.244377000  | 1.843593000  |
| 1 | -1.319814000 | 1.916089000  | 2.169013000  |
| 6 | -3.212587000 | 2.749376000  | 2.771228000  |
| 1 | -2.916279000 | 2.832794000  | 3.815765000  |
| 6 | -4.494889000 | 3.115818000  | 2.373297000  |
| 1 | -5.206644000 | 3.500501000  | 3.102584000  |
| 6 | -4.863042000 | 2.991587000  | 1.037554000  |
| 1 | -5.861884000 | 3.281953000  | 0.715070000  |
| 6 | -3.950439000 | 2.513451000  | 0.100141000  |
| 1 | -4.241136000 | 2.461504000  | -0.947609000 |
| 6 | -2.186295000 | -1.485094000 | 2.345652000  |
| 6 | -1.646408000 | -2.113436000 | 3.473350000  |
| 1 | -0.753493000 | -2.729796000 | 3.377343000  |
| 6 | -2.243944000 | -1.961475000 | 4.720283000  |
| 1 | -1.809482000 | -2.455737000 | 5.587647000  |
| 6 | -3.392144000 | -1.188926000 | 4.857036000  |
| 1 | -3.863204000 | -1.077277000 | 5.832478000  |
| 6 | -3.934667000 | -0.556063000 | 3.742686000  |
| 1 | -4.830212000 | 0.056645000  | 3.838323000  |
| 6 | -3.329239000 | -0.691469000 | 2.498434000  |
| 1 | -3.759981000 | -0.178672000 | 1.637074000  |
| 6 | -0.417984000 | -3.230842000 | 0.877783000  |
| 6 | 0.954132000  | -3.248200000 | 1.130498000  |
| 1 | 1.479869000  | -2.305309000 | 1.265044000  |
| 6 | 1.648054000  | -4.451926000 | 1.209175000  |
| 1 | 2.722988000  | -4.436866000 | 1.389051000  |
| 6 | 0.972382000  | -5.654630000 | 1.039812000  |
| 1 | 1.512102000  | -6.599212000 | 1.090685000  |
| 6 | -0.401502000 | -5.649019000 | 0.806003000  |
| 1 | -0.936674000 | -6.588990000 | 0.679260000  |
| 6 | -1.094892000 | -4.447317000 | 0.726089000  |
| 1 | -2.166509000 | -4.456670000 | 0.528820000  |
| 6 | -2.668096000 | -2.124707000 | -0.464754000 |
| 6 | -3.949172000 | -2.504193000 | -0.049772000 |
| 1 | -4.226226000 | -2.445355000 | 1.001181000  |
| 6 | -4.876733000 | -2.983248000 | -0.972043000 |
| 1 | -5.872253000 | -3.267225000 | -0.633954000 |
| 6 | -4.527953000 | -3.116253000 | -2.311906000 |
| 1 | -5.251465000 | -3.500708000 | -3.029643000 |
| 6 | -3.248828000 | -2.759547000 | -2.728729000 |

|                   |              |              |              |
|-------------------|--------------|--------------|--------------|
| 1                 | -2.966367000 | -2.851522000 | -3.776405000 |
| 6                 | -2.330273000 | -2.255269000 | -1.815861000 |
| 1                 | -1.342543000 | -1.937606000 | -2.156117000 |
| complex $I_{Mes}$ |              |              |              |
| 44                | 0.214752000  | -0.013477000 | 0.000603000  |
| 15                | -1.207298000 | 1.626534000  | -0.662671000 |
| 15                | -1.268416000 | -1.607016000 | 0.646355000  |
| 6                 | 2.501039000  | -1.154604000 | -1.925139000 |
| 6                 | 3.734093000  | -0.488406000 | -1.726200000 |
| 6                 | 4.878579000  | -1.245725000 | -1.492794000 |
| 1                 | 5.826426000  | -0.726942000 | -1.326374000 |
| 6                 | 4.852629000  | -2.638926000 | -1.442911000 |
| 6                 | 3.640844000  | -3.275916000 | -1.687325000 |
| 1                 | 3.601299000  | -4.367794000 | -1.686892000 |
| 6                 | 2.468299000  | -2.565106000 | -1.951727000 |
| 6                 | 3.852545000  | 1.006136000  | -1.756977000 |
| 1                 | 3.373583000  | 1.434056000  | -2.648287000 |
| 1                 | 4.908211000  | 1.308432000  | -1.750078000 |
| 1                 | 3.379453000  | 1.465087000  | -0.875258000 |
| 6                 | 6.099929000  | -3.415637000 | -1.145868000 |
| 1                 | 5.896273000  | -4.490589000 | -1.066095000 |
| 1                 | 6.557151000  | -3.090690000 | -0.200302000 |
| 1                 | 6.859158000  | -3.278693000 | -1.928802000 |
| 6                 | 1.221516000  | -3.317738000 | -2.293605000 |
| 1                 | 0.439358000  | -3.182360000 | -1.535525000 |
| 1                 | 1.421820000  | -4.393643000 | -2.373175000 |
| 1                 | 0.800450000  | -2.967956000 | -3.247151000 |
| 6                 | 2.462879000  | 1.105736000  | 1.954575000  |
| 6                 | 2.459748000  | 2.517121000  | 2.020631000  |
| 6                 | 3.644660000  | 3.209489000  | 1.774338000  |
| 1                 | 3.629745000  | 4.301614000  | 1.809691000  |
| 6                 | 4.842360000  | 2.553315000  | 1.501242000  |
| 6                 | 4.839757000  | 1.160849000  | 1.512263000  |
| 1                 | 5.775952000  | 0.626856000  | 1.331158000  |
| 6                 | 3.679054000  | 0.420154000  | 1.730761000  |
| 6                 | 1.229227000  | 3.285670000  | 2.385791000  |
| 1                 | 0.442187000  | 3.181426000  | 1.627628000  |
| 1                 | 1.451008000  | 4.355506000  | 2.487024000  |
| 1                 | 0.804531000  | 2.924308000  | 3.333295000  |
| 6                 | 6.090210000  | 3.321546000  | 1.186660000  |
| 1                 | 6.991979000  | 2.751169000  | 1.443153000  |
| 1                 | 6.126607000  | 4.276009000  | 1.727531000  |
| 1                 | 6.151743000  | 3.558048000  | 0.113563000  |
| 6                 | 3.768348000  | -1.076636000 | 1.727755000  |
| 1                 | 3.285191000  | -1.513081000 | 2.612715000  |
| 1                 | 4.817255000  | -1.400964000 | 1.709532000  |
| 1                 | 3.282243000  | -1.507735000 | 0.838871000  |
| 6                 | -2.219340000 | -1.479995000 | 2.232428000  |
| 6                 | -3.401604000 | -0.735531000 | 2.315396000  |
| 1                 | -3.809552000 | -0.250949000 | 1.426749000  |

|   |              |              |              |
|---|--------------|--------------|--------------|
| 6 | -4.071377000 | -0.605842000 | 3.527030000  |
| 1 | -4.994190000 | -0.028511000 | 3.568929000  |
| 6 | -3.554687000 | -1.192257000 | 4.678074000  |
| 1 | -4.075844000 | -1.084235000 | 5.628137000  |
| 6 | -2.368064000 | -1.914971000 | 4.610836000  |
| 1 | -1.954659000 | -2.373543000 | 5.507582000  |
| 6 | -1.706895000 | -2.062957000 | 3.396584000  |
| 1 | -0.787406000 | -2.645116000 | 3.354616000  |
| 6 | -0.405179000 | -3.248190000 | 0.851773000  |
| 6 | -1.064611000 | -4.455034000 | 0.590549000  |
| 1 | -2.107847000 | -4.456612000 | 0.276986000  |
| 6 | -0.386510000 | -5.662994000 | 0.706228000  |
| 1 | -0.908996000 | -6.594478000 | 0.492974000  |
| 6 | 0.953860000  | -5.685454000 | 1.084997000  |
| 1 | 1.481950000  | -6.634603000 | 1.164212000  |
| 6 | 1.610111000  | -4.492048000 | 1.362956000  |
| 1 | 2.659478000  | -4.489007000 | 1.657588000  |
| 6 | 0.933098000  | -3.281970000 | 1.246518000  |
| 1 | 1.441566000  | -2.346608000 | 1.470164000  |
| 6 | -2.557122000 | -2.076880000 | -0.606661000 |
| 6 | -2.183935000 | -2.081510000 | -1.954265000 |
| 1 | -1.210094000 | -1.683435000 | -2.245080000 |
| 6 | -3.053684000 | -2.564118000 | -2.925661000 |
| 1 | -2.746815000 | -2.553905000 | -3.970463000 |
| 6 | -4.317254000 | -3.023101000 | -2.569105000 |
| 1 | -5.002982000 | -3.390832000 | -3.331324000 |
| 6 | -4.704102000 | -3.009716000 | -1.231977000 |
| 1 | -5.690288000 | -3.369975000 | -0.942719000 |
| 6 | -3.825823000 | -2.552286000 | -0.253747000 |
| 1 | -4.129125000 | -2.581336000 | 0.791533000  |
| 6 | -2.117377000 | 1.534136000  | -2.274404000 |
| 6 | -1.569467000 | 2.123000000  | -3.419103000 |
| 1 | -0.642670000 | 2.690767000  | -3.348172000 |
| 6 | -2.202658000 | 1.995204000  | -4.650723000 |
| 1 | -1.761924000 | 2.458265000  | -5.532050000 |
| 6 | -3.394940000 | 1.286546000  | -4.755006000 |
| 1 | -3.893053000 | 1.193438000  | -5.718916000 |
| 6 | -3.946384000 | 0.693861000  | -3.623401000 |
| 1 | -4.873891000 | 0.126961000  | -3.694129000 |
| 6 | -3.305812000 | 0.804547000  | -2.394278000 |
| 1 | -3.741827000 | 0.315116000  | -1.521521000 |
| 6 | -0.296012000 | 3.246598000  | -0.823890000 |
| 6 | 1.053867000  | 3.250020000  | -1.178788000 |
| 1 | 1.541718000  | 2.304679000  | -1.405796000 |
| 6 | 1.767879000  | 4.442085000  | -1.250818000 |
| 1 | 2.825722000  | 4.414988000  | -1.512728000 |
| 6 | 1.135451000  | 5.648684000  | -0.973982000 |
| 1 | 1.692282000  | 6.583552000  | -1.018791000 |
| 6 | -0.217076000 | 5.657702000  | -0.639974000 |

|                  |              |              |              |
|------------------|--------------|--------------|--------------|
| 1                | -0.720661000 | 6.600160000  | -0.429473000 |
| 6                | -0.930745000 | 4.467321000  | -0.564292000 |
| 1                | -1.982527000 | 4.492593000  | -0.281965000 |
| 6                | -2.519101000 | 2.120777000  | 0.556463000  |
| 6                | -3.766466000 | 2.625147000  | 0.169310000  |
| 1                | -4.040730000 | 2.660748000  | -0.883755000 |
| 6                | -4.660279000 | 3.103619000  | 1.123175000  |
| 1                | -5.629223000 | 3.486918000  | 0.806478000  |
| 6                | -4.309968000 | 3.108880000  | 2.470283000  |
| 1                | -5.007242000 | 3.492976000  | 3.213735000  |
| 6                | -3.067416000 | 2.620824000  | 2.860873000  |
| 1                | -2.788946000 | 2.604952000  | 3.913545000  |
| 6                | -2.182951000 | 2.117548000  | 1.913636000  |
| 1                | -1.225978000 | 1.699158000  | 2.230541000  |
| 16               | 0.955000000  | 0.172187000  | 2.245416000  |
| 16               | 1.011869000  | -0.193547000 | -2.227661000 |
| <b>complex 4</b> |              |              |              |
| 44               | -0.519346000 | -0.160238000 | -0.537564000 |
| 16               | 0.343210000  | -2.033038000 | 0.302149000  |
| 6                | 2.113697000  | -2.200597000 | 0.088351000  |
| 6                | 2.940997000  | -2.047612000 | 1.218680000  |
| 6                | 4.295086000  | -2.349695000 | 1.079651000  |
| 6                | 4.839874000  | -2.776915000 | -0.127307000 |
| 6                | 3.993982000  | -2.899354000 | -1.228449000 |
| 6                | 2.633733000  | -2.616016000 | -1.155285000 |
| 6                | 2.390979000  | -1.623268000 | 2.566627000  |
| 6                | 3.422957000  | -0.938881000 | 3.455028000  |
| 6                | 1.792988000  | -2.820275000 | 3.309713000  |
| 6                | 1.760141000  | -2.813708000 | -2.377020000 |
| 6                | 2.434650000  | -2.390673000 | -3.677120000 |
| 6                | 1.289728000  | -4.266366000 | -2.452605000 |
| 16               | -0.770740000 | 1.598902000  | 0.812096000  |
| 6                | 0.309747000  | 2.972116000  | 0.396210000  |
| 6                | -0.029802000 | 3.793861000  | -0.698263000 |
| 6                | 0.703854000  | 4.961276000  | -0.893552000 |
| 6                | 1.755435000  | 5.325205000  | -0.058984000 |
| 6                | 2.084664000  | 4.473263000  | 0.992550000  |
| 6                | 1.393973000  | 3.289020000  | 1.241828000  |
| 6                | -1.142634000 | 3.478709000  | -1.676871000 |
| 6                | -0.630085000 | 3.424352000  | -3.114417000 |
| 6                | -2.297495000 | 4.466406000  | -1.529337000 |
| 6                | 1.808134000  | 2.382965000  | 2.386133000  |
| 6                | 3.238307000  | 2.619388000  | 2.857229000  |
| 6                | 0.865352000  | 2.513854000  | 3.585389000  |
| 15               | -2.656852000 | -0.949717000 | 0.143635000  |
| 6                | -2.900927000 | -2.726127000 | -0.264220000 |
| 6                | -2.506971000 | -3.164527000 | -1.535289000 |
| 6                | -2.669876000 | -4.498006000 | -1.888275000 |
| 6                | -3.208612000 | -5.403219000 | -0.975930000 |
| 6                | -3.591041000 | -4.971837000 | 0.288941000  |

|   |              |              |              |
|---|--------------|--------------|--------------|
| 6 | -3.440999000 | -3.634319000 | 0.646536000  |
| 6 | -3.078033000 | -0.810484000 | 1.929538000  |
| 6 | -2.057510000 | -0.885553000 | 2.882871000  |
| 6 | -2.361816000 | -0.821980000 | 4.238124000  |
| 6 | -3.683588000 | -0.684431000 | 4.650848000  |
| 6 | -4.704265000 | -0.612560000 | 3.706875000  |
| 6 | -4.404626000 | -0.674158000 | 2.350292000  |
| 6 | -4.042225000 | -0.088870000 | -0.712096000 |
| 6 | -4.984640000 | -0.778178000 | -1.476906000 |
| 6 | -6.017814000 | -0.085385000 | -2.102883000 |
| 6 | -6.119909000 | 1.293928000  | -1.965136000 |
| 6 | -5.185719000 | 1.985446000  | -1.197334000 |
| 6 | -4.149782000 | 1.299852000  | -0.576442000 |
| 1 | 4.958512000  | -2.245864000 | 1.938823000  |
| 1 | 4.410566000  | -3.224410000 | -2.182892000 |
| 1 | 1.582074000  | -0.895057000 | 2.381751000  |
| 1 | 2.925626000  | -0.480369000 | 4.321344000  |
| 1 | 4.159375000  | -1.653098000 | 3.850702000  |
| 1 | 3.967672000  | -0.153883000 | 2.915006000  |
| 1 | 1.381445000  | -2.507974000 | 4.280459000  |
| 1 | 2.572117000  | -3.573197000 | 3.499434000  |
| 1 | 0.989484000  | -3.304183000 | 2.739495000  |
| 1 | 0.871882000  | -2.177356000 | -2.263754000 |
| 1 | 1.705924000  | -2.421003000 | -4.498526000 |
| 1 | 3.259499000  | -3.061206000 | -3.958448000 |
| 1 | 2.823942000  | -1.367425000 | -3.601963000 |
| 1 | 0.648691000  | -4.419644000 | -3.332721000 |
| 1 | 0.717076000  | -4.553422000 | -1.559403000 |
| 1 | 2.148403000  | -4.948867000 | -2.538345000 |
| 1 | 0.445412000  | 5.603907000  | -1.737656000 |
| 1 | 2.926196000  | 4.747221000  | 1.627982000  |
| 1 | -1.537800000 | 2.479790000  | -1.451225000 |
| 1 | -1.426552000 | 3.071769000  | -3.784242000 |
| 1 | 0.224080000  | 2.737862000  | -3.193286000 |
| 1 | -0.309018000 | 4.412276000  | -3.474659000 |
| 1 | -3.119348000 | 4.199666000  | -2.209359000 |
| 1 | -2.687443000 | 4.473183000  | -0.500743000 |
| 1 | -1.983439000 | 5.492439000  | -1.769834000 |
| 1 | 1.748585000  | 1.346693000  | 2.007206000  |
| 1 | 3.503923000  | 1.880660000  | 3.623494000  |
| 1 | 3.353946000  | 3.608963000  | 3.322042000  |
| 1 | 3.961706000  | 2.537999000  | 2.035449000  |
| 1 | 1.167356000  | 1.821805000  | 4.385461000  |
| 1 | 0.907433000  | 3.535950000  | 3.990131000  |
| 1 | -0.179378000 | 2.294299000  | 3.330675000  |
| 1 | -2.073471000 | -2.451571000 | -2.240103000 |
| 1 | -2.367016000 | -4.834951000 | -2.878281000 |
| 1 | -3.326639000 | -6.449570000 | -1.253050000 |
| 1 | -4.007596000 | -5.677904000 | 1.005376000  |

|                            |              |              |              |
|----------------------------|--------------|--------------|--------------|
| 1                          | -3.740367000 | -3.302169000 | 1.640009000  |
| 1                          | -1.019780000 | -0.988671000 | 2.562336000  |
| 1                          | -1.560017000 | -0.875335000 | 4.972900000  |
| 1                          | -3.919968000 | -0.630182000 | 5.712307000  |
| 1                          | -5.739070000 | -0.504003000 | 4.027252000  |
| 1                          | -5.204932000 | -0.615523000 | 1.612036000  |
| 1                          | -4.915829000 | -1.859407000 | -1.587413000 |
| 1                          | -6.746359000 | -0.631275000 | -2.700049000 |
| 1                          | -6.928916000 | 1.832875000  | -2.455581000 |
| 1                          | -5.261058000 | 3.065850000  | -1.081686000 |
| 1                          | -3.417597000 | 1.844889000  | 0.022055000  |
| 6                          | 7.012141000  | -2.113301000 | -1.190616000 |
| 6                          | 6.314850000  | -3.084097000 | -0.239608000 |
| 1                          | 6.753384000  | -2.947468000 | 0.763081000  |
| 1                          | 6.852528000  | -1.071230000 | -0.886482000 |
| 1                          | 8.093743000  | -2.304055000 | -1.218611000 |
| 1                          | 6.628492000  | -2.221687000 | -2.214920000 |
| 6                          | 6.562680000  | -4.529864000 | -0.663731000 |
| 1                          | 6.073062000  | -5.238259000 | 0.016709000  |
| 1                          | 6.176367000  | -4.718119000 | -1.675482000 |
| 1                          | 7.638417000  | -4.752101000 | -0.675874000 |
| 6                          | 1.650303000  | 7.832954000  | -0.210607000 |
| 6                          | 2.539786000  | 6.594686000  | -0.294737000 |
| 1                          | 3.292995000  | 6.666049000  | 0.507672000  |
| 1                          | 1.119653000  | 7.882402000  | 0.748804000  |
| 1                          | 2.246979000  | 8.748680000  | -0.321311000 |
| 1                          | 0.895241000  | 7.833131000  | -1.009516000 |
| 6                          | 3.282281000  | 6.550059000  | -1.628726000 |
| 1                          | 3.934117000  | 5.669937000  | -1.694352000 |
| 1                          | 2.577342000  | 6.503888000  | -2.470873000 |
| 1                          | 3.899761000  | 7.449015000  | -1.761575000 |
| 8                          | -1.208669000 | -0.186010000 | -2.301174000 |
| 1                          | -0.449096000 | 0.106202000  | -2.849265000 |
| 17                         | 1.544696000  | 0.662412000  | -1.558044000 |
| <b>geometric isomer 4'</b> |              |              |              |
| 44                         | -0.498598000 | -0.053301000 | -0.461701000 |
| 16                         | 0.173742000  | -2.118106000 | 0.005873000  |
| 6                          | 1.949089000  | -2.310169000 | -0.073506000 |
| 6                          | 2.652646000  | -2.503108000 | 1.135059000  |
| 6                          | 4.012351000  | -2.797812000 | 1.056090000  |
| 6                          | 4.683864000  | -2.878305000 | -0.161008000 |
| 6                          | 3.959045000  | -2.670226000 | -1.333353000 |
| 6                          | 2.596472000  | -2.386689000 | -1.324155000 |
| 6                          | 1.960784000  | -2.444381000 | 2.484121000  |
| 6                          | 2.885239000  | -2.083985000 | 3.641846000  |
| 6                          | 1.267138000  | -3.774609000 | 2.790315000  |
| 6                          | 1.859396000  | -2.233032000 | -2.636787000 |
| 6                          | 2.602047000  | -1.354807000 | -3.635815000 |
| 6                          | 1.540937000  | -3.607476000 | -3.223752000 |
| 16                         | -0.466832000 | 1.372939000  | 1.216229000  |



|    |              |              |              |
|----|--------------|--------------|--------------|
| 6  | 0.706153000  | 2.653393000  | 0.724141000  |
| 6  | 0.211721000  | 3.751594000  | -0.016826000 |
| 6  | 1.094091000  | 4.786588000  | -0.318309000 |
| 6  | 2.431544000  | 4.762184000  | 0.071672000  |
| 6  | 2.886403000  | 3.653161000  | 0.777651000  |
| 6  | 2.057543000  | 2.582409000  | 1.107901000  |
| 6  | -1.237527000 | 3.884899000  | -0.441239000 |
| 6  | -1.413469000 | 4.410724000  | -1.862060000 |
| 6  | -1.991193000 | 4.759702000  | 0.559593000  |
| 6  | 2.650021000  | 1.415110000  | 1.866045000  |
| 6  | 3.847230000  | 0.817434000  | 1.130281000  |
| 6  | 3.003835000  | 1.841470000  | 3.290063000  |
| 15 | -2.773831000 | -0.706868000 | 0.106348000  |
| 6  | -3.313810000 | -2.306212000 | -0.647085000 |
| 6  | -2.719015000 | -2.740055000 | -1.836844000 |
| 6  | -3.146664000 | -3.916290000 | -2.444496000 |
| 6  | -4.165124000 | -4.669825000 | -1.869509000 |
| 6  | -4.760879000 | -4.243582000 | -0.686088000 |
| 6  | -4.338946000 | -3.066805000 | -0.077789000 |
| 6  | -3.193826000 | -0.914347000 | 1.893315000  |
| 6  | -2.220426000 | -1.443665000 | 2.746588000  |
| 6  | -2.505626000 | -1.661663000 | 4.089786000  |
| 6  | -3.763511000 | -1.349224000 | 4.595983000  |
| 6  | -4.738239000 | -0.822151000 | 3.754130000  |
| 6  | -4.456841000 | -0.606402000 | 2.408920000  |
| 6  | -4.033405000 | 0.496812000  | -0.499794000 |
| 6  | -4.841837000 | 0.212515000  | -1.601130000 |
| 6  | -5.717962000 | 1.174477000  | -2.095420000 |
| 6  | -5.799117000 | 2.423787000  | -1.491521000 |
| 6  | -4.998054000 | 2.712938000  | -0.389393000 |
| 6  | -4.113298000 | 1.759110000  | 0.099755000  |
| 1  | 4.582320000  | -2.952964000 | 1.973348000  |
| 1  | 4.473294000  | -2.726080000 | -2.294219000 |
| 1  | 1.189868000  | -1.656304000 | 2.424424000  |
| 1  | 2.291081000  | -1.886304000 | 4.543834000  |
| 1  | 3.574523000  | -2.905312000 | 3.884978000  |
| 1  | 3.486167000  | -1.190099000 | 3.429158000  |
| 1  | 0.755995000  | -3.732416000 | 3.762907000  |
| 1  | 2.011142000  | -4.583430000 | 2.835877000  |
| 1  | 0.525247000  | -4.042794000 | 2.027012000  |
| 1  | 0.911623000  | -1.724208000 | -2.431593000 |
| 1  | 1.958508000  | -1.154593000 | -4.503218000 |
| 1  | 3.520658000  | -1.827236000 | -4.013731000 |
| 1  | 2.861197000  | -0.395351000 | -3.172231000 |
| 1  | 0.986810000  | -3.504521000 | -4.167528000 |
| 1  | 0.929370000  | -4.205744000 | -2.532875000 |
| 1  | 2.460551000  | -4.173746000 | -3.433834000 |
| 1  | 0.718697000  | 5.643585000  | -0.880323000 |
| 1  | 3.936935000  | 3.617986000  | 1.073117000  |

|   |              |              |              |
|---|--------------|--------------|--------------|
| 1 | -1.696656000 | 2.887373000  | -0.428194000 |
| 1 | -2.465842000 | 4.305124000  | -2.160479000 |
| 1 | -0.804297000 | 3.842880000  | -2.576900000 |
| 1 | -1.151569000 | 5.474901000  | -1.951735000 |
| 1 | -3.046314000 | 4.861173000  | 0.267537000  |
| 1 | -1.951005000 | 4.340489000  | 1.574904000  |
| 1 | -1.556167000 | 5.769155000  | 0.599050000  |
| 1 | 1.886023000  | 0.624899000  | 1.927108000  |
| 1 | 4.233129000  | -0.056141000 | 1.675797000  |
| 1 | 4.673738000  | 1.537146000  | 1.037966000  |
| 1 | 3.539893000  | 0.486443000  | 0.128733000  |
| 1 | 3.393696000  | 0.993417000  | 3.870014000  |
| 1 | 3.775122000  | 2.625146000  | 3.291606000  |
| 1 | 2.125063000  | 2.238062000  | 3.817480000  |
| 1 | -1.923220000 | -2.151268000 | -2.294349000 |
| 1 | -2.676030000 | -4.244816000 | -3.369643000 |
| 1 | -4.494549000 | -5.593029000 | -2.343707000 |
| 1 | -5.557146000 | -4.830949000 | -0.231678000 |
| 1 | -4.807844000 | -2.742095000 | 0.850873000  |
| 1 | -1.232590000 | -1.688502000 | 2.353660000  |
| 1 | -1.738103000 | -2.072270000 | 4.744159000  |
| 1 | -3.984520000 | -1.514527000 | 5.649238000  |
| 1 | -5.723918000 | -0.575524000 | 4.145496000  |
| 1 | -5.224025000 | -0.192607000 | 1.754349000  |
| 1 | -4.782450000 | -0.762039000 | -2.084323000 |
| 1 | -6.339987000 | 0.942319000  | -2.958251000 |
| 1 | -6.487437000 | 3.173966000  | -1.877341000 |
| 1 | -5.063766000 | 3.686418000  | 0.095464000  |
| 1 | -3.483044000 | 1.995903000  | 0.959543000  |
| 6 | 6.912047000  | -1.825142000 | -0.520154000 |
| 6 | 6.173970000  | -3.123279000 | -0.192776000 |
| 1 | 6.474922000  | -3.435635000 | 0.821302000  |
| 1 | 6.654030000  | -1.029470000 | 0.191249000  |
| 1 | 8.000461000  | -1.973511000 | -0.494248000 |
| 1 | 6.643408000  | -1.470037000 | -1.525374000 |
| 6 | 6.573368000  | -4.232256000 | -1.161150000 |
| 1 | 6.034648000  | -5.165135000 | -0.951757000 |
| 1 | 6.362795000  | -3.950584000 | -2.202353000 |
| 1 | 7.650549000  | -4.434663000 | -1.091166000 |
| 6 | 2.903689000  | 7.216069000  | 0.344028000  |
| 6 | 3.367376000  | 5.897516000  | -0.271093000 |
| 1 | 4.350711000  | 5.650672000  | 0.162602000  |
| 1 | 2.780345000  | 7.131003000  | 1.431187000  |
| 1 | 3.629280000  | 8.015580000  | 0.141768000  |
| 1 | 1.938997000  | 7.532308000  | -0.077497000 |
| 6 | 3.544819000  | 6.037130000  | -1.781587000 |
| 1 | 3.895306000  | 5.099854000  | -2.231956000 |
| 1 | 2.595933000  | 6.305482000  | -2.267313000 |
| 1 | 4.272343000  | 6.825813000  | -2.017106000 |

|                                      |              |              |              |
|--------------------------------------|--------------|--------------|--------------|
| 8                                    | 1.386788000  | 0.378684000  | -1.051854000 |
| 1                                    | 1.303928000  | 1.142863000  | -1.645139000 |
| 17                                   | -1.249483000 | 0.584370000  | -2.558985000 |
| <b>tosyl azide (TsN<sub>3</sub>)</b> |              |              |              |
| 16                                   | -1.529521000 | -0.722499000 | 0.307778000  |
| 8                                    | -1.797733000 | -2.102841000 | -0.074626000 |
| 8                                    | -2.062429000 | -0.086588000 | 1.514685000  |
| 7                                    | -2.130575000 | 0.196655000  | -1.087431000 |
| 7                                    | -2.244496000 | 1.400465000  | -0.826344000 |
| 7                                    | -2.370498000 | 2.517973000  | -0.658693000 |
| 6                                    | 0.208920000  | -0.384579000 | 0.191154000  |
| 6                                    | 0.744270000  | 0.668721000  | 0.925753000  |
| 1                                    | 0.108052000  | 1.249591000  | 1.590914000  |
| 6                                    | 2.099297000  | 0.944409000  | 0.798823000  |
| 1                                    | 2.536867000  | 1.764763000  | 1.367232000  |
| 6                                    | 2.914329000  | 0.183268000  | -0.043141000 |
| 6                                    | 2.342224000  | -0.868643000 | -0.767397000 |
| 1                                    | 2.971965000  | -1.466368000 | -1.426289000 |
| 6                                    | 0.991638000  | -1.162079000 | -0.657938000 |
| 1                                    | 0.541233000  | -1.981308000 | -1.214636000 |
| 6                                    | 4.381262000  | 0.467794000  | -0.151674000 |
| 1                                    | 4.614474000  | 1.502577000  | 0.125116000  |
| 1                                    | 4.750477000  | 0.294372000  | -1.169854000 |
| 1                                    | 4.957914000  | -0.187200000 | 0.516391000  |
| <b>complex 8</b>                     |              |              |              |
| 44                                   | -0.443419000 | -0.625701000 | -0.141075000 |
| 16                                   | -2.642970000 | -0.050104000 | -0.133312000 |
| 6                                    | -2.906415000 | 1.719232000  | -0.310730000 |
| 6                                    | -2.917918000 | 2.299975000  | -1.596596000 |
| 6                                    | -3.208453000 | 3.660590000  | -1.696562000 |
| 6                                    | -3.520468000 | 4.440441000  | -0.589209000 |
| 6                                    | -3.551894000 | 3.826606000  | 0.661785000  |
| 6                                    | -3.243006000 | 2.479129000  | 0.835553000  |
| 6                                    | -2.718289000 | 1.484480000  | -2.856849000 |
| 6                                    | -2.169580000 | 2.282949000  | -4.031890000 |
| 6                                    | -4.036236000 | 0.811561000  | -3.248415000 |
| 6                                    | -3.333802000 | 1.859252000  | 2.218671000  |
| 6                                    | -3.302974000 | 2.874651000  | 3.356492000  |
| 6                                    | -4.610604000 | 1.023200000  | 2.356533000  |
| 16                                   | 0.812882000  | -0.572430000 | 1.755785000  |
| 6                                    | 2.128013000  | 0.631161000  | 1.499658000  |
| 6                                    | 1.891500000  | 2.018355000  | 1.593390000  |
| 6                                    | 2.987816000  | 2.876052000  | 1.534303000  |
| 6                                    | 4.298290000  | 2.415936000  | 1.411105000  |
| 6                                    | 4.495956000  | 1.044786000  | 1.286284000  |
| 6                                    | 3.437079000  | 0.136155000  | 1.302991000  |
| 6                                    | 0.522945000  | 2.604923000  | 1.862280000  |
| 6                                    | 0.185181000  | 3.799270000  | 0.976329000  |
| 6                                    | 0.438175000  | 2.955136000  | 3.348335000  |
| 6                                    | 3.728251000  | -1.345149000 | 1.161992000  |

|    |              |              |              |
|----|--------------|--------------|--------------|
| 6  | 4.925502000  | -1.663146000 | 0.272505000  |
| 6  | 3.926137000  | -1.974776000 | 2.541903000  |
| 15 | -1.056735000 | -2.804018000 | 0.303227000  |
| 6  | -1.570333000 | -3.231494000 | 2.016457000  |
| 6  | -2.198557000 | -2.262861000 | 2.804164000  |
| 6  | -2.650706000 | -2.586532000 | 4.079125000  |
| 6  | -2.481148000 | -3.875270000 | 4.574520000  |
| 6  | -1.860503000 | -4.845771000 | 3.792756000  |
| 6  | -1.405983000 | -4.527185000 | 2.518056000  |
| 6  | -2.467185000 | -3.339491000 | -0.758339000 |
| 6  | -2.533927000 | -2.887267000 | -2.082968000 |
| 6  | -3.586461000 | -3.284951000 | -2.898441000 |
| 6  | -4.582583000 | -4.121465000 | -2.401225000 |
| 6  | -4.522429000 | -4.566839000 | -1.085614000 |
| 6  | -3.467886000 | -4.178931000 | -0.264328000 |
| 6  | 0.301225000  | -3.984567000 | -0.080103000 |
| 6  | 1.394622000  | -4.075697000 | 0.788291000  |
| 6  | 2.452256000  | -4.926346000 | 0.491654000  |
| 6  | 2.434503000  | -5.682781000 | -0.678052000 |
| 6  | 1.352797000  | -5.589936000 | -1.546180000 |
| 6  | 0.287368000  | -4.745082000 | -1.249654000 |
| 1  | -3.201312000 | 4.134313000  | -2.678561000 |
| 1  | -3.812199000 | 4.427213000  | 1.533094000  |
| 1  | -1.990259000 | 0.691969000  | -2.642825000 |
| 1  | -1.889299000 | 1.597067000  | -4.839895000 |
| 1  | -2.913487000 | 2.986326000  | -4.434951000 |
| 1  | -1.269714000 | 2.845667000  | -3.752791000 |
| 1  | -3.903174000 | 0.221438000  | -4.166270000 |
| 1  | -4.812543000 | 1.567184000  | -3.441370000 |
| 1  | -4.401935000 | 0.137505000  | -2.461710000 |
| 1  | -2.463280000 | 1.190140000  | 2.340820000  |
| 1  | -3.155589000 | 2.358497000  | 4.314245000  |
| 1  | -4.251778000 | 3.426212000  | 3.428805000  |
| 1  | -2.498276000 | 3.611645000  | 3.240819000  |
| 1  | -4.672400000 | 0.575321000  | 3.359103000  |
| 1  | -4.665710000 | 0.214050000  | 1.617967000  |
| 1  | -5.492465000 | 1.666440000  | 2.221052000  |
| 1  | 2.818493000  | 3.952555000  | 1.614627000  |
| 1  | 5.505864000  | 0.661645000  | 1.143682000  |
| 1  | -0.230589000 | 1.831744000  | 1.652081000  |
| 1  | -0.850890000 | 4.117206000  | 1.163965000  |
| 1  | 0.261458000  | 3.533600000  | -0.087245000 |
| 1  | 0.834528000  | 4.665302000  | 1.171700000  |
| 1  | -0.541397000 | 3.377877000  | 3.604711000  |
| 1  | 0.600145000  | 2.066142000  | 3.973881000  |
| 1  | 1.203380000  | 3.697930000  | 3.618569000  |
| 1  | 2.848405000  | -1.812265000 | 0.691608000  |
| 1  | 4.962890000  | -2.744615000 | 0.082193000  |
| 1  | 5.880436000  | -1.388302000 | 0.744981000  |

|    |              |              |              |
|----|--------------|--------------|--------------|
| 1  | 4.860551000  | -1.152931000 | -0.697297000 |
| 1  | 4.116266000  | -3.055293000 | 2.456444000  |
| 1  | 4.794548000  | -1.522611000 | 3.044032000  |
| 1  | 3.050995000  | -1.829449000 | 3.188781000  |
| 1  | -2.333128000 | -1.253439000 | 2.414089000  |
| 1  | -3.134074000 | -1.824677000 | 4.688379000  |
| 1  | -2.832888000 | -4.125391000 | 5.574130000  |
| 1  | -1.727298000 | -5.855628000 | 4.177058000  |
| 1  | -0.921519000 | -5.289426000 | 1.907859000  |
| 1  | -1.758623000 | -2.223439000 | -2.470651000 |
| 1  | -3.632183000 | -2.928239000 | -3.925979000 |
| 1  | -5.410876000 | -4.422200000 | -3.040868000 |
| 1  | -5.302000000 | -5.216004000 | -0.690363000 |
| 1  | -3.434922000 | -4.525786000 | 0.767671000  |
| 1  | 1.417091000  | -3.477392000 | 1.700590000  |
| 1  | 3.295291000  | -4.997315000 | 1.178525000  |
| 1  | 3.265689000  | -6.346667000 | -0.910413000 |
| 1  | 1.333033000  | -6.179001000 | -2.461486000 |
| 1  | -0.556021000 | -4.678629000 | -1.935074000 |
| 6  | -2.626546000 | 6.732077000  | -0.161800000 |
| 6  | -3.784396000 | 5.920102000  | -0.741359000 |
| 1  | -3.835111000 | 6.131483000  | -1.822455000 |
| 1  | -1.671291000 | 6.447464000  | -0.622406000 |
| 1  | -2.781028000 | 7.808222000  | -0.321439000 |
| 1  | -2.536320000 | 6.563437000  | 0.921496000  |
| 6  | -5.110508000 | 6.347653000  | -0.119333000 |
| 1  | -5.949763000 | 5.764964000  | -0.519930000 |
| 1  | -5.101979000 | 6.214937000  | 0.971818000  |
| 1  | -5.305197000 | 7.410557000  | -0.316509000 |
| 6  | 6.775940000  | 2.866206000  | 0.982236000  |
| 6  | 5.435888000  | 3.414656000  | 1.452965000  |
| 1  | 5.156891000  | 4.252726000  | 0.789566000  |
| 1  | 6.719284000  | 2.418870000  | -0.019912000 |
| 1  | 7.524538000  | 3.668312000  | 0.952436000  |
| 1  | 7.152738000  | 2.095906000  | 1.670696000  |
| 6  | 5.581963000  | 3.972865000  | 2.870694000  |
| 1  | 4.650968000  | 4.430091000  | 3.228536000  |
| 1  | 5.844227000  | 3.164206000  | 3.568195000  |
| 1  | 6.375461000  | 4.731390000  | 2.915672000  |
| 16 | 0.759372000  | 0.224800000  | -2.411262000 |
| 8  | 0.291551000  | 1.244438000  | -1.382319000 |
| 8  | 0.288827000  | 0.352218000  | -3.801509000 |
| 7  | 0.341277000  | -1.231833000 | -1.725193000 |
| 6  | 2.540610000  | 0.335938000  | -2.464484000 |
| 6  | 3.250485000  | -0.598619000 | -3.216042000 |
| 1  | 2.724359000  | -1.415546000 | -3.707871000 |
| 6  | 4.626862000  | -0.464859000 | -3.324756000 |
| 1  | 5.198845000  | -1.197224000 | -3.895152000 |
| 6  | 5.296700000  | 0.600762000  | -2.711724000 |

|                  |               |               |               |
|------------------|---------------|---------------|---------------|
| 6                | 4. 552089000  | 1. 537796000  | -1. 995232000 |
| 1                | 5. 059286000  | 2. 384373000  | -1. 529864000 |
| 6                | 3. 176123000  | 1. 407281000  | -1. 851987000 |
| 1                | 2. 595337000  | 2. 125887000  | -1. 274992000 |
| 6                | 6. 790878000  | 0. 701202000  | -2. 767087000 |
| 1                | 7. 242284000  | 0. 214153000  | -1. 888472000 |
| 1                | 7. 127857000  | 1. 745707000  | -2. 765570000 |
| 1                | 7. 202165000  | 0. 210073000  | -3. 657458000 |
| <b>complex 9</b> |               |               |               |
| 44               | 0. 590837000  | -0. 450887000 | 0. 086709000  |
| 16               | -1. 795046000 | 2. 155539000  | 0. 032102000  |
| 16               | 2. 369254000  | -0. 899564000 | -2. 739703000 |
| 16               | 1. 633465000  | 0. 711880000  | 1. 699244000  |
| 16               | -1. 011033000 | -1. 967892000 | 0. 518928000  |
| 15               | 2. 054276000  | -2. 304691000 | 0. 814440000  |
| 8                | -1. 245827000 | 3. 517255000  | -0. 038139000 |
| 8                | -2. 168417000 | 1. 530408000  | 1. 310712000  |
| 8                | 1. 629543000  | -1. 614939000 | -3. 785854000 |
| 8                | 3. 294863000  | -1. 587066000 | -1. 829323000 |
| 7                | -0. 647394000 | 1. 062275000  | -0. 672177000 |
| 7                | -0. 388739000 | 1. 440950000  | -1. 922378000 |
| 7                | 0. 533235000  | 0. 824507000  | -2. 506298000 |
| 7                | 1. 188229000  | -0. 110534000 | -1. 708395000 |
| 6                | -3. 202234000 | 2. 133639000  | -1. 070056000 |
| 6                | -4. 342693000 | 1. 434751000  | -0. 702768000 |
| 1                | -4. 360489000 | 0. 865829000  | 0. 225014000  |
| 6                | -5. 456688000 | 1. 482092000  | -1. 532830000 |
| 1                | -6. 364016000 | 0. 951158000  | -1. 239893000 |
| 6                | -5. 435511000 | 2. 198336000  | -2. 729267000 |
| 6                | -4. 274523000 | 2. 903827000  | -3. 067874000 |
| 1                | -4. 253029000 | 3. 483320000  | -3. 991220000 |
| 6                | -3. 161396000 | 2. 890253000  | -2. 241847000 |
| 1                | -2. 266777000 | 3. 455324000  | -2. 490383000 |
| 6                | -6. 622570000 | 2. 202484000  | -3. 644526000 |
| 1                | -6. 515807000 | 1. 440577000  | -4. 430495000 |
| 1                | -6. 741238000 | 3. 169601000  | -4. 149044000 |
| 1                | -7. 551536000 | 1. 983791000  | -3. 103301000 |
| 6                | 3. 243200000  | 0. 477025000  | -3. 463461000 |
| 6                | 4. 396398000  | 0. 938098000  | -2. 837062000 |
| 1                | 4. 771756000  | 0. 438657000  | -1. 944896000 |
| 6                | 5. 072010000  | 2. 018783000  | -3. 389841000 |
| 1                | 5. 981029000  | 2. 386921000  | -2. 912963000 |
| 6                | 4. 608285000  | 2. 639424000  | -4. 552604000 |
| 6                | 3. 456424000  | 2. 139273000  | -5. 168429000 |
| 1                | 3. 095253000  | 2. 607975000  | -6. 083796000 |
| 6                | 2. 766533000  | 1. 061811000  | -4. 632450000 |
| 1                | 1. 866603000  | 0. 672947000  | -5. 102371000 |
| 6                | 5. 316453000  | 3. 833811000  | -5. 115469000 |
| 1                | 5. 215263000  | 3. 887005000  | -6. 206249000 |
| 1                | 6. 385425000  | 3. 823416000  | -4. 870685000 |

|   |               |               |               |
|---|---------------|---------------|---------------|
| 1 | 4. 897889000  | 4. 763809000  | -4. 705115000 |
| 6 | 1. 069345000  | 2. 395560000  | 1. 891047000  |
| 6 | 1. 595684000  | 3. 388584000  | 1. 039653000  |
| 6 | 1. 292748000  | 4. 714161000  | 1. 330505000  |
| 1 | 1. 678891000  | 5. 503841000  | 0. 683036000  |
| 6 | 0. 471244000  | 5. 072008000  | 2. 395087000  |
| 6 | -0. 044918000 | 4. 063698000  | 3. 206901000  |
| 1 | -0. 700659000 | 4. 333207000  | 4. 034879000  |
| 6 | 0. 235153000  | 2. 719189000  | 2. 981782000  |
| 6 | 2. 478916000  | 3. 059886000  | -0. 147136000 |
| 1 | 2. 271735000  | 2. 021912000  | -0. 447810000 |
| 6 | 3. 951528000  | 3. 133922000  | 0. 256194000  |
| 1 | 4. 599231000  | 2. 875263000  | -0. 595649000 |
| 1 | 4. 176359000  | 2. 445031000  | 1. 083687000  |
| 1 | 4. 213767000  | 4. 151018000  | 0. 583537000  |
| 6 | 2. 196358000  | 3. 926682000  | -1. 370044000 |
| 1 | 1. 124608000  | 3. 928134000  | -1. 610439000 |
| 1 | 2. 744531000  | 3. 530071000  | -2. 237808000 |
| 1 | 2. 521354000  | 4. 967483000  | -1. 226632000 |
| 6 | 0. 070086000  | 6. 515986000  | 2. 577746000  |
| 1 | 0. 804442000  | 7. 129891000  | 2. 029220000  |
| 6 | 0. 068615000  | 6. 975716000  | 4. 031067000  |
| 1 | -0. 715393000 | 6. 470721000  | 4. 612678000  |
| 1 | -0. 131567000 | 8. 053899000  | 4. 091205000  |
| 1 | 1. 030547000  | 6. 777912000  | 4. 521512000  |
| 6 | -1. 299809000 | 6. 738540000  | 1. 934466000  |
| 1 | -1. 300208000 | 6. 421259000  | 0. 883961000  |
| 1 | -1. 595101000 | 7. 795924000  | 1. 987262000  |
| 1 | -2. 065392000 | 6. 143429000  | 2. 453176000  |
| 6 | -0. 291640000 | 1. 656976000  | 3. 924202000  |
| 1 | -0. 425696000 | 0. 731452000  | 3. 341284000  |
| 6 | 0. 735804000  | 1. 386751000  | 5. 025392000  |
| 1 | 0. 900005000  | 2. 294544000  | 5. 624892000  |
| 1 | 1. 708203000  | 1. 079699000  | 4. 615323000  |
| 1 | 0. 382474000  | 0. 595797000  | 5. 702729000  |
| 6 | -1. 642251000 | 1. 995758000  | 4. 541103000  |
| 1 | -1. 574086000 | 2. 828611000  | 5. 256159000  |
| 1 | -2. 017705000 | 1. 127693000  | 5. 101057000  |
| 1 | -2. 376695000 | 2. 252448000  | 3. 767926000  |
| 6 | -2. 709529000 | -1. 614467000 | 0. 071011000  |
| 6 | -3. 653262000 | -1. 521175000 | 1. 118276000  |
| 6 | -5. 000209000 | -1. 651138000 | 0. 788773000  |
| 1 | -5. 748834000 | -1. 603730000 | 1. 582876000  |
| 6 | -5. 436236000 | -1. 844326000 | -0. 523629000 |
| 6 | -4. 482132000 | -1. 854680000 | -1. 535453000 |
| 1 | -4. 800189000 | -1. 955932000 | -2. 573304000 |
| 6 | -3. 116745000 | -1. 733383000 | -1. 272301000 |
| 6 | -3. 233957000 | -1. 334891000 | 2. 562941000  |
| 1 | -2. 252271000 | -0. 835452000 | 2. 557619000  |

|   |              |              |              |
|---|--------------|--------------|--------------|
| 6 | -4.186233000 | -0.439057000 | 3.347106000  |
| 1 | -4.325042000 | 0.530152000  | 2.850120000  |
| 1 | -3.775260000 | -0.247407000 | 4.347273000  |
| 1 | -5.172312000 | -0.903522000 | 3.492321000  |
| 6 | -3.079693000 | -2.688731000 | 3.257034000  |
| 1 | -4.035651000 | -3.234090000 | 3.254692000  |
| 1 | -2.769514000 | -2.552043000 | 4.302731000  |
| 1 | -2.325068000 | -3.319451000 | 2.765583000  |
| 6 | -6.911268000 | -2.061453000 | -0.784637000 |
| 1 | -7.462986000 | -1.366295000 | -0.126902000 |
| 6 | -7.341116000 | -1.793284000 | -2.220714000 |
| 1 | -7.021888000 | -0.801993000 | -2.571924000 |
| 1 | -8.433690000 | -1.852137000 | -2.308009000 |
| 1 | -6.921305000 | -2.541953000 | -2.907882000 |
| 6 | -7.300256000 | -3.485939000 | -0.383416000 |
| 1 | -6.753976000 | -4.213467000 | -1.001119000 |
| 1 | -8.375962000 | -3.656841000 | -0.527489000 |
| 1 | -7.056785000 | -3.692453000 | 0.666475000  |
| 6 | -2.140510000 | -1.775207000 | -2.429070000 |
| 1 | -1.156415000 | -1.459396000 | -2.057106000 |
| 6 | -2.512846000 | -0.804480000 | -3.546927000 |
| 1 | -3.447634000 | -1.089926000 | -4.051626000 |
| 1 | -1.716159000 | -0.791643000 | -4.303040000 |
| 1 | -2.629990000 | 0.219380000  | -3.164934000 |
| 6 | -1.987609000 | -3.199608000 | -2.961003000 |
| 1 | -1.713980000 | -3.899268000 | -2.157443000 |
| 1 | -1.204730000 | -3.235654000 | -3.732539000 |
| 1 | -2.926294000 | -3.558579000 | -3.408376000 |
| 6 | 3.763030000  | -1.874787000 | 1.372080000  |
| 6 | 4.432163000  | -0.783152000 | 0.812069000  |
| 1 | 3.932390000  | -0.179898000 | 0.057912000  |
| 6 | 5.718942000  | -0.457881000 | 1.223205000  |
| 1 | 6.223040000  | 0.401017000  | 0.780513000  |
| 6 | 6.353185000  | -1.218211000 | 2.201472000  |
| 1 | 7.360614000  | -0.961458000 | 2.525156000  |
| 6 | 5.691830000  | -2.299570000 | 2.773930000  |
| 1 | 6.177140000  | -2.891816000 | 3.547884000  |
| 6 | 4.400714000  | -2.622283000 | 2.367724000  |
| 1 | 3.881617000  | -3.457034000 | 2.839069000  |
| 6 | 2.239300000  | -3.754395000 | -0.314944000 |
| 6 | 3.290131000  | -4.658476000 | -0.149475000 |
| 1 | 4.042460000  | -4.491845000 | 0.620553000  |
| 6 | 3.393113000  | -5.770921000 | -0.977678000 |
| 1 | 4.218908000  | -6.467642000 | -0.842516000 |
| 6 | 2.451909000  | -5.987182000 | -1.979374000 |
| 1 | 2.538210000  | -6.855219000 | -2.630999000 |
| 6 | 1.407580000  | -5.084903000 | -2.152934000 |
| 1 | 0.674826000  | -5.233023000 | -2.944780000 |
| 6 | 1.300846000  | -3.974019000 | -1.324226000 |



|                   |              |              |              |
|-------------------|--------------|--------------|--------------|
| 1                 | 0.489422000  | -3.263328000 | -1.478844000 |
| 6                 | 1.338594000  | -3.090376000 | 2.336633000  |
| 6                 | 1.236791000  | -2.335403000 | 3.512481000  |
| 1                 | 1.634999000  | -1.320636000 | 3.545999000  |
| 6                 | 0.631106000  | -2.868928000 | 4.642249000  |
| 1                 | 0.563933000  | -2.270689000 | 5.549934000  |
| 6                 | 0.114497000  | -4.162536000 | 4.615248000  |
| 1                 | -0.364488000 | -4.578479000 | 5.500381000  |
| 6                 | 0.210728000  | -4.918356000 | 3.453134000  |
| 1                 | -0.191281000 | -5.929796000 | 3.422347000  |
| 6                 | 0.819372000  | -4.386764000 | 2.318213000  |
| 1                 | 0.877653000  | -4.986060000 | 1.410541000  |
| <b>complex 10</b> |              |              |              |
| 44                | 0.590837000  | -0.450887000 | 0.086709000  |
| 16                | -1.795046000 | 2.155539000  | 0.032102000  |
| 16                | 2.369254000  | -0.899564000 | -2.739703000 |
| 16                | 1.633465000  | 0.711880000  | 1.699244000  |
| 16                | -1.011033000 | -1.967892000 | 0.518928000  |
| 15                | 2.054276000  | -2.304691000 | 0.814440000  |
| 8                 | -1.245827000 | 3.517255000  | -0.038139000 |
| 8                 | -2.168417000 | 1.530408000  | 1.310712000  |
| 8                 | 1.629543000  | -1.614939000 | -3.785854000 |
| 8                 | 3.294863000  | -1.587066000 | -1.829323000 |
| 7                 | -0.647394000 | 1.062275000  | -0.672177000 |
| 7                 | -0.388739000 | 1.440950000  | -1.922378000 |
| 7                 | 0.533235000  | 0.824507000  | -2.506298000 |
| 7                 | 1.188229000  | -0.110534000 | -1.708395000 |
| 6                 | -3.202234000 | 2.133639000  | -1.070056000 |
| 6                 | -4.342693000 | 1.434751000  | -0.702768000 |
| 1                 | -4.360489000 | 0.865829000  | 0.225014000  |
| 6                 | -5.456688000 | 1.482092000  | -1.532830000 |
| 1                 | -6.364016000 | 0.951158000  | -1.239893000 |
| 6                 | -5.435511000 | 2.198336000  | -2.729267000 |
| 6                 | -4.274523000 | 2.903827000  | -3.067874000 |
| 1                 | -4.253029000 | 3.483320000  | -3.991220000 |
| 6                 | -3.161396000 | 2.890253000  | -2.241847000 |
| 1                 | -2.266777000 | 3.455324000  | -2.490383000 |
| 6                 | -6.622570000 | 2.202484000  | -3.644526000 |
| 1                 | -6.515807000 | 1.440577000  | -4.430495000 |
| 1                 | -6.741238000 | 3.169601000  | -4.149044000 |
| 1                 | -7.551536000 | 1.983791000  | -3.103301000 |
| 6                 | 3.243200000  | 0.477025000  | -3.463461000 |
| 6                 | 4.396398000  | 0.938098000  | -2.837062000 |
| 1                 | 4.771756000  | 0.438657000  | -1.944896000 |
| 6                 | 5.072010000  | 2.018783000  | -3.389841000 |
| 1                 | 5.981029000  | 2.386921000  | -2.912963000 |
| 6                 | 4.608285000  | 2.639424000  | -4.552604000 |
| 6                 | 3.456424000  | 2.139273000  | -5.168429000 |
| 1                 | 3.095253000  | 2.607975000  | -6.083796000 |
| 6                 | 2.766533000  | 1.061811000  | -4.632450000 |

|   |               |               |               |
|---|---------------|---------------|---------------|
| 1 | 1. 866603000  | 0. 672947000  | -5. 102371000 |
| 6 | 5. 316453000  | 3. 833811000  | -5. 115469000 |
| 1 | 5. 215263000  | 3. 887005000  | -6. 206249000 |
| 1 | 6. 385425000  | 3. 823416000  | -4. 870685000 |
| 1 | 4. 897889000  | 4. 763809000  | -4. 705115000 |
| 6 | 1. 069345000  | 2. 395560000  | 1. 891047000  |
| 6 | 1. 595684000  | 3. 388584000  | 1. 039653000  |
| 6 | 1. 292748000  | 4. 714161000  | 1. 330505000  |
| 1 | 1. 678891000  | 5. 503841000  | 0. 683036000  |
| 6 | 0. 471244000  | 5. 072008000  | 2. 395087000  |
| 6 | -0. 044918000 | 4. 063698000  | 3. 206901000  |
| 1 | -0. 700659000 | 4. 333207000  | 4. 034879000  |
| 6 | 0. 235153000  | 2. 719189000  | 2. 981782000  |
| 6 | 2. 478916000  | 3. 059886000  | -0. 147136000 |
| 1 | 2. 271735000  | 2. 021912000  | -0. 447810000 |
| 6 | 3. 951528000  | 3. 133922000  | 0. 256194000  |
| 1 | 4. 599231000  | 2. 875263000  | -0. 595649000 |
| 1 | 4. 176359000  | 2. 445031000  | 1. 083687000  |
| 1 | 4. 213767000  | 4. 151018000  | 0. 583537000  |
| 6 | 2. 196358000  | 3. 926682000  | -1. 370044000 |
| 1 | 1. 124608000  | 3. 928134000  | -1. 610439000 |
| 1 | 2. 744531000  | 3. 530071000  | -2. 237808000 |
| 1 | 2. 521354000  | 4. 967483000  | -1. 226632000 |
| 6 | 0. 070086000  | 6. 515986000  | 2. 577746000  |
| 1 | 0. 804442000  | 7. 129891000  | 2. 029220000  |
| 6 | 0. 068615000  | 6. 975716000  | 4. 031067000  |
| 1 | -0. 715393000 | 6. 470721000  | 4. 612678000  |
| 1 | -0. 131567000 | 8. 053899000  | 4. 091205000  |
| 1 | 1. 030547000  | 6. 777912000  | 4. 521512000  |
| 6 | -1. 299809000 | 6. 738540000  | 1. 934466000  |
| 1 | -1. 300208000 | 6. 421259000  | 0. 883961000  |
| 1 | -1. 595101000 | 7. 795924000  | 1. 987262000  |
| 1 | -2. 065392000 | 6. 143429000  | 2. 453176000  |
| 6 | -0. 291640000 | 1. 656976000  | 3. 924202000  |
| 1 | -0. 425696000 | 0. 731452000  | 3. 341284000  |
| 6 | 0. 735804000  | 1. 386751000  | 5. 025392000  |
| 1 | 0. 900005000  | 2. 294544000  | 5. 624892000  |
| 1 | 1. 708203000  | 1. 079699000  | 4. 615323000  |
| 1 | 0. 382474000  | 0. 595797000  | 5. 702729000  |
| 6 | -1. 642251000 | 1. 995758000  | 4. 541103000  |
| 1 | -1. 574086000 | 2. 828611000  | 5. 256159000  |
| 1 | -2. 017705000 | 1. 127693000  | 5. 101057000  |
| 1 | -2. 376695000 | 2. 252448000  | 3. 767926000  |
| 6 | -2. 709529000 | -1. 614467000 | 0. 071011000  |
| 6 | -3. 653262000 | -1. 521175000 | 1. 118276000  |
| 6 | -5. 000209000 | -1. 651138000 | 0. 788773000  |
| 1 | -5. 748834000 | -1. 603730000 | 1. 582876000  |
| 6 | -5. 436236000 | -1. 844326000 | -0. 523629000 |
| 6 | -4. 482132000 | -1. 854680000 | -1. 535453000 |

|   |              |              |              |
|---|--------------|--------------|--------------|
| 1 | -4.800189000 | -1.955932000 | -2.573304000 |
| 6 | -3.116745000 | -1.733383000 | -1.272301000 |
| 6 | -3.233957000 | -1.334891000 | 2.562941000  |
| 1 | -2.252271000 | -0.835452000 | 2.557619000  |
| 6 | -4.186233000 | -0.439057000 | 3.347106000  |
| 1 | -4.325042000 | 0.530152000  | 2.850120000  |
| 1 | -3.775260000 | -0.247407000 | 4.347273000  |
| 1 | -5.172312000 | -0.903522000 | 3.492321000  |
| 6 | -3.079693000 | -2.688731000 | 3.257034000  |
| 1 | -4.035651000 | -3.234090000 | 3.254692000  |
| 1 | -2.769514000 | -2.552043000 | 4.302731000  |
| 1 | -2.325068000 | -3.319451000 | 2.765583000  |
| 6 | -6.911268000 | -2.061453000 | -0.784637000 |
| 1 | -7.462986000 | -1.366295000 | -0.126902000 |
| 6 | -7.341116000 | -1.793284000 | -2.220714000 |
| 1 | -7.021888000 | -0.801993000 | -2.571924000 |
| 1 | -8.433690000 | -1.852137000 | -2.308009000 |
| 1 | -6.921305000 | -2.541953000 | -2.907882000 |
| 6 | -7.300256000 | -3.485939000 | -0.383416000 |
| 1 | -6.753976000 | -4.213467000 | -1.001119000 |
| 1 | -8.375962000 | -3.656841000 | -0.527489000 |
| 1 | -7.056785000 | -3.692453000 | 0.666475000  |
| 6 | -2.140510000 | -1.775207000 | -2.429070000 |
| 1 | -1.156415000 | -1.459396000 | -2.057106000 |
| 6 | -2.512846000 | -0.804480000 | -3.546927000 |
| 1 | -3.447634000 | -1.089926000 | -4.051626000 |
| 1 | -1.716159000 | -0.791643000 | -4.303040000 |
| 1 | -2.629990000 | 0.219380000  | -3.164934000 |
| 6 | -1.987609000 | -3.199608000 | -2.961003000 |
| 1 | -1.713980000 | -3.899268000 | -2.157443000 |
| 1 | -1.204730000 | -3.235654000 | -3.732539000 |
| 1 | -2.926294000 | -3.558579000 | -3.408376000 |
| 6 | 3.763030000  | -1.874787000 | 1.372080000  |
| 6 | 4.432163000  | -0.783152000 | 0.812069000  |
| 1 | 3.932390000  | -0.179898000 | 0.057912000  |
| 6 | 5.718942000  | -0.457881000 | 1.223205000  |
| 1 | 6.223040000  | 0.401017000  | 0.780513000  |
| 6 | 6.353185000  | -1.218211000 | 2.201472000  |
| 1 | 7.360614000  | -0.961458000 | 2.525156000  |
| 6 | 5.691830000  | -2.299570000 | 2.773930000  |
| 1 | 6.177140000  | -2.891816000 | 3.547884000  |
| 6 | 4.400714000  | -2.622283000 | 2.367724000  |
| 1 | 3.881617000  | -3.457034000 | 2.839069000  |
| 6 | 2.239300000  | -3.754395000 | -0.314944000 |
| 6 | 3.290131000  | -4.658476000 | -0.149475000 |
| 1 | 4.042460000  | -4.491845000 | 0.620553000  |
| 6 | 3.393113000  | -5.770921000 | -0.977678000 |
| 1 | 4.218908000  | -6.467642000 | -0.842516000 |
| 6 | 2.451909000  | -5.987182000 | -1.979374000 |

|   |              |              |              |
|---|--------------|--------------|--------------|
| 1 | 2.538210000  | -6.855219000 | -2.630999000 |
| 6 | 1.407580000  | -5.084903000 | -2.152934000 |
| 1 | 0.674826000  | -5.233023000 | -2.944780000 |
| 6 | 1.300846000  | -3.974019000 | -1.324226000 |
| 1 | 0.489422000  | -3.263328000 | -1.478844000 |
| 6 | 1.338594000  | -3.090376000 | 2.336633000  |
| 6 | 1.236791000  | -2.335403000 | 3.512481000  |
| 1 | 1.634999000  | -1.320636000 | 3.545999000  |
| 6 | 0.631106000  | -2.868928000 | 4.642249000  |
| 1 | 0.563933000  | -2.270689000 | 5.549934000  |
| 6 | 0.114497000  | -4.162536000 | 4.615248000  |
| 1 | -0.364488000 | -4.578479000 | 5.500381000  |
| 6 | 0.210728000  | -4.918356000 | 3.453134000  |
| 1 | -0.191281000 | -5.929796000 | 3.422347000  |
| 6 | 0.819372000  | -4.386764000 | 2.318213000  |
| 1 | 0.877653000  | -4.986060000 | 1.410541000  |

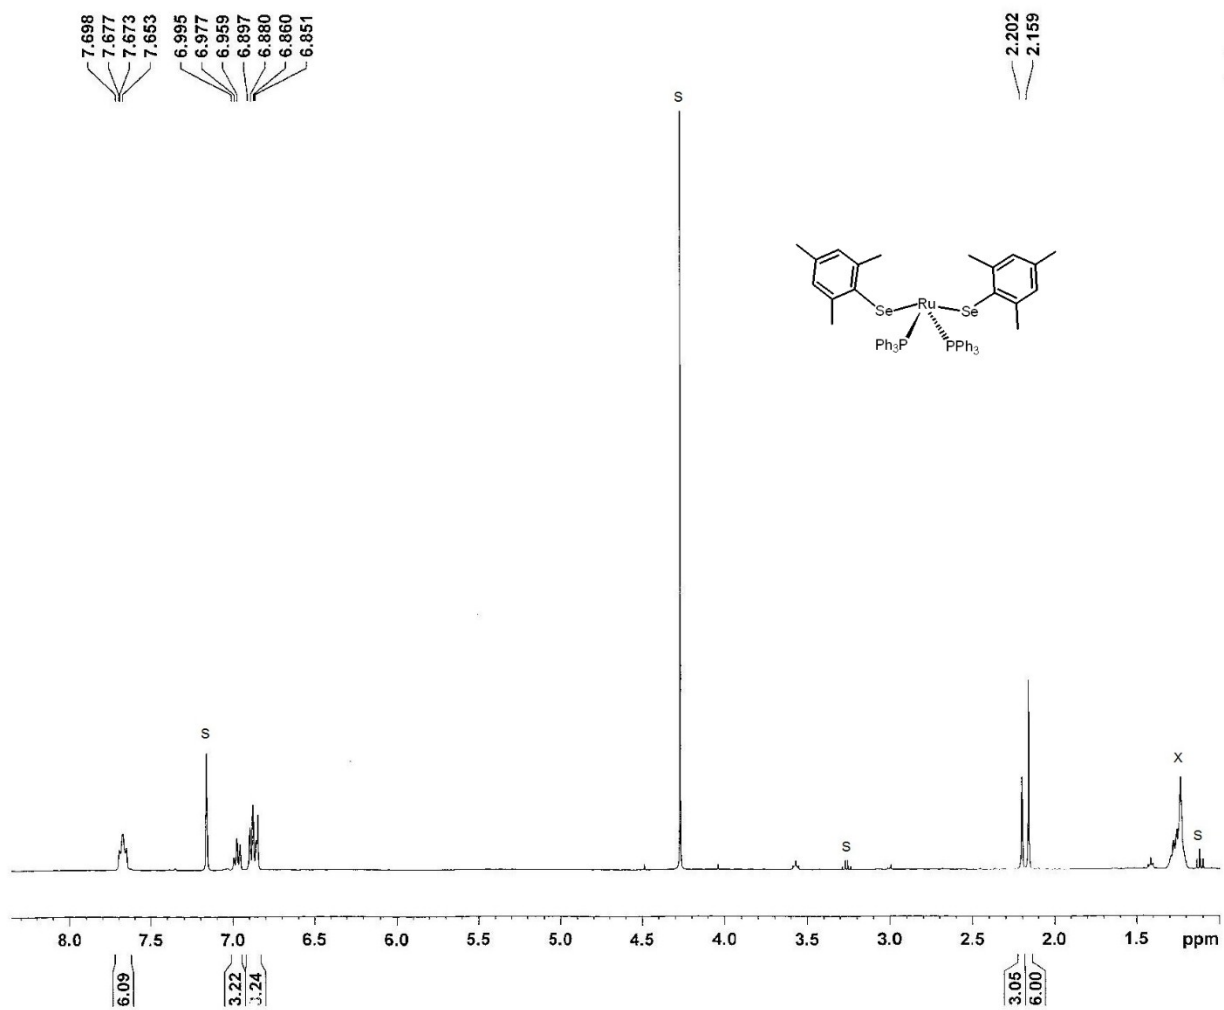

Figure S5.  $^1\text{H}$  NMR (400 MHz, 298 K,  $\text{C}_6\text{D}_6$ ) spectrum of **2** (X = impurity, S = residual solvent).

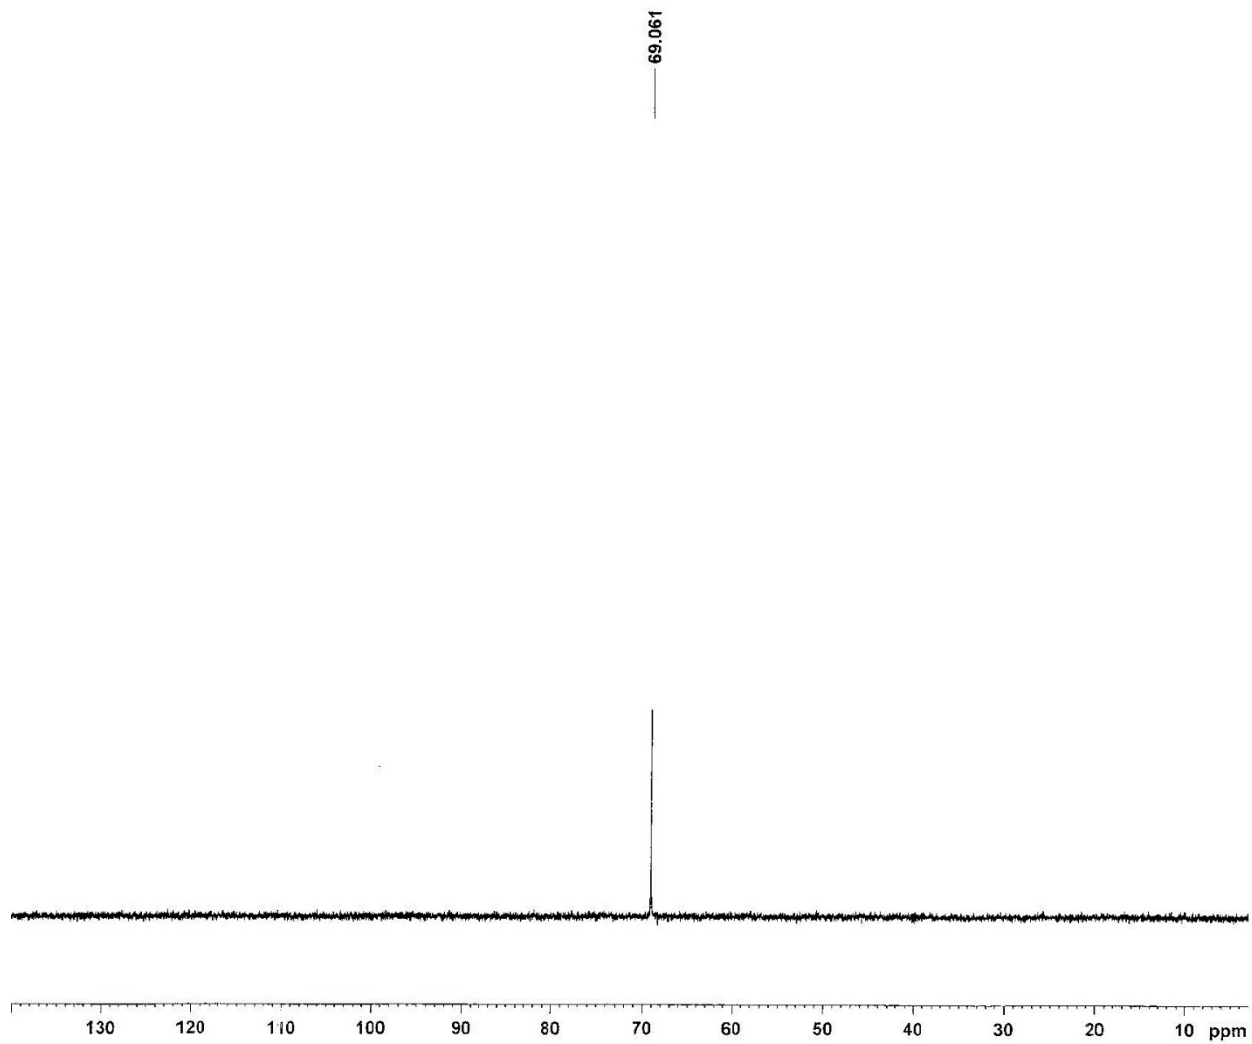

Figure S6.  $^{31}\text{P}\{^1\text{H}\}$  NMR (162 MHz, 298 K,  $\text{C}_6\text{D}_6$ ) spectrum of **2**.

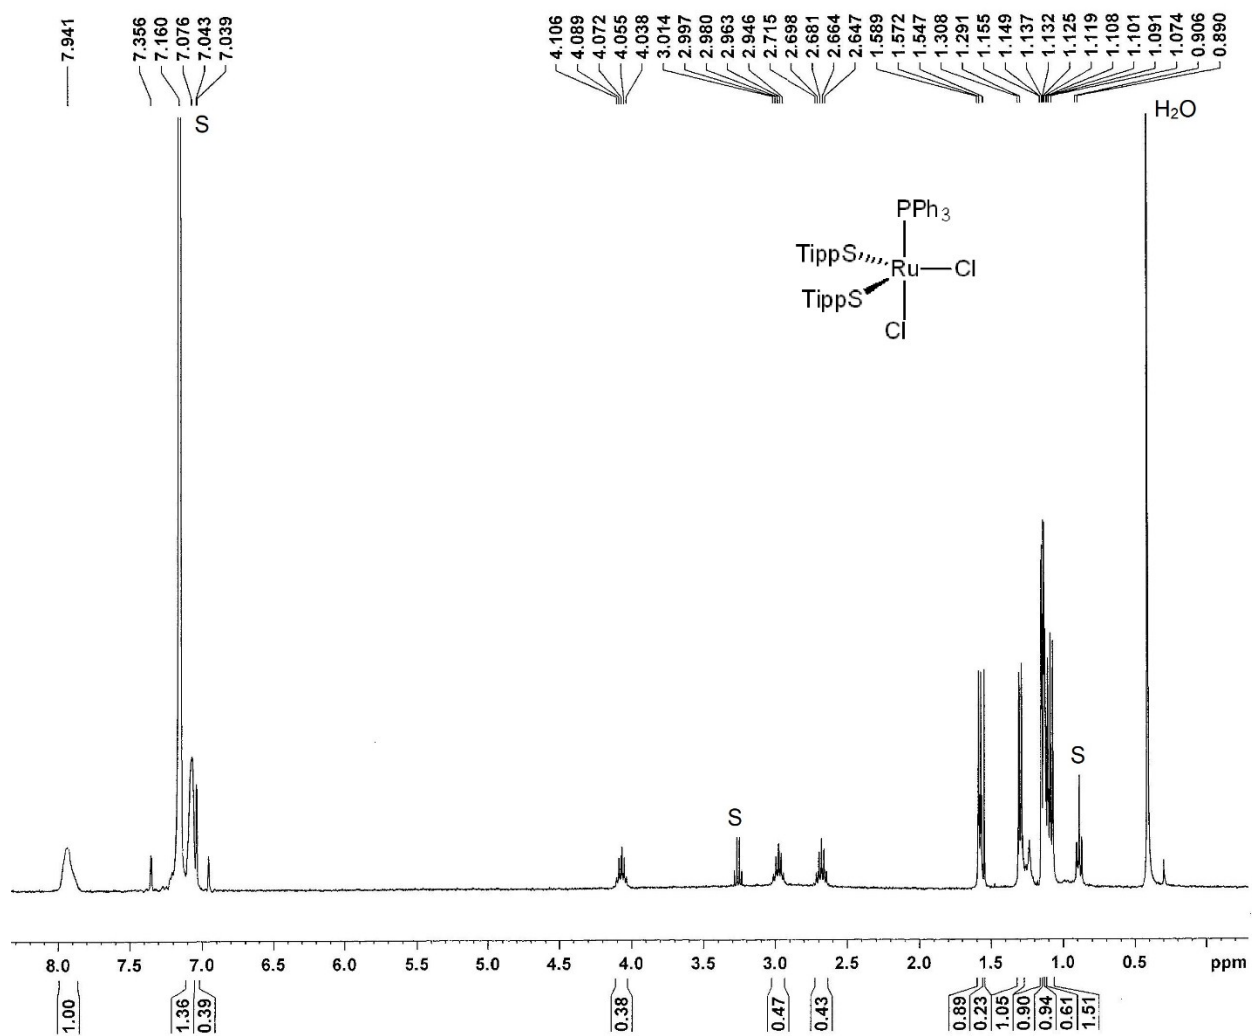

Figure S7.  $^1\text{H}$  NMR (400 MHz, 298 K,  $\text{C}_6\text{D}_6$ ) spectrum of **3** (X = impurity, S = residual solvent).

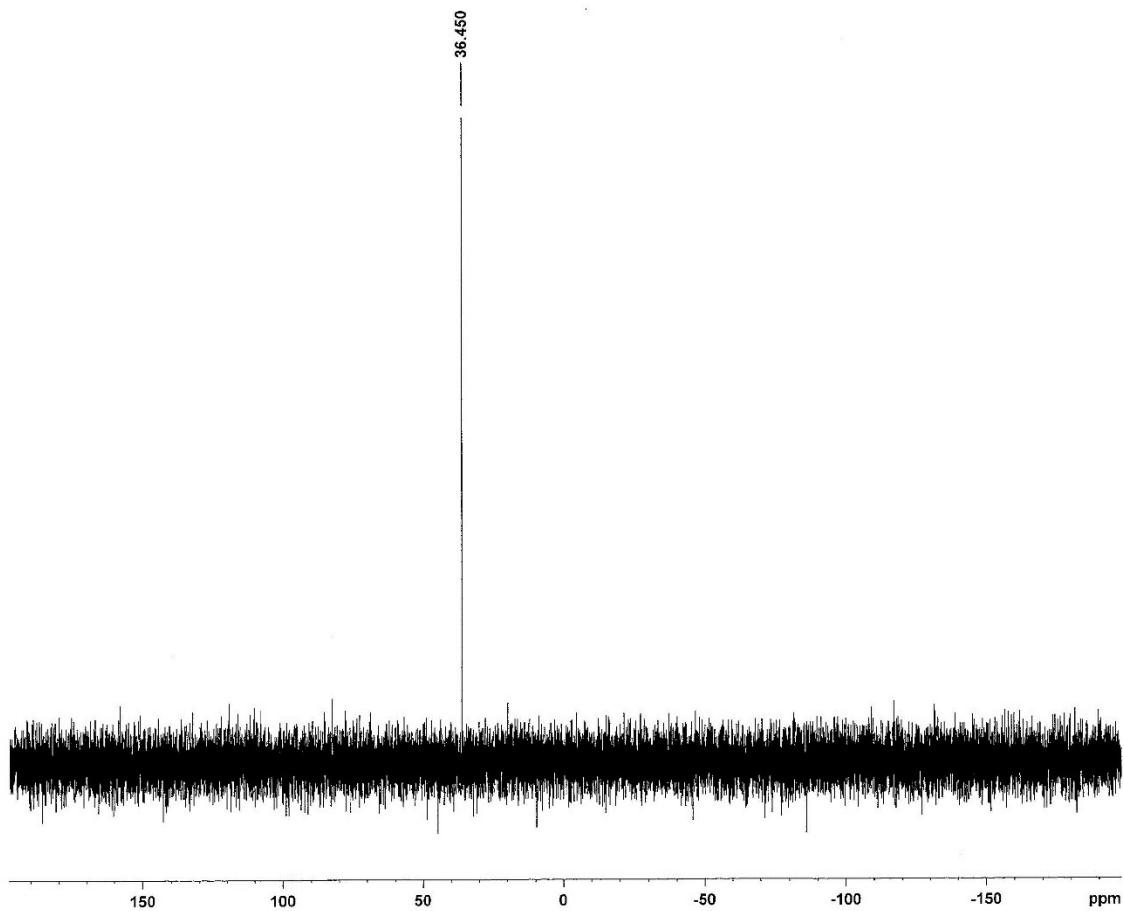

Figure S8.  $^{31}\text{P}\{^1\text{H}\}$  NMR (162 MHz, 298 K,  $\text{C}_6\text{D}_6$ ) spectrum of **3**.



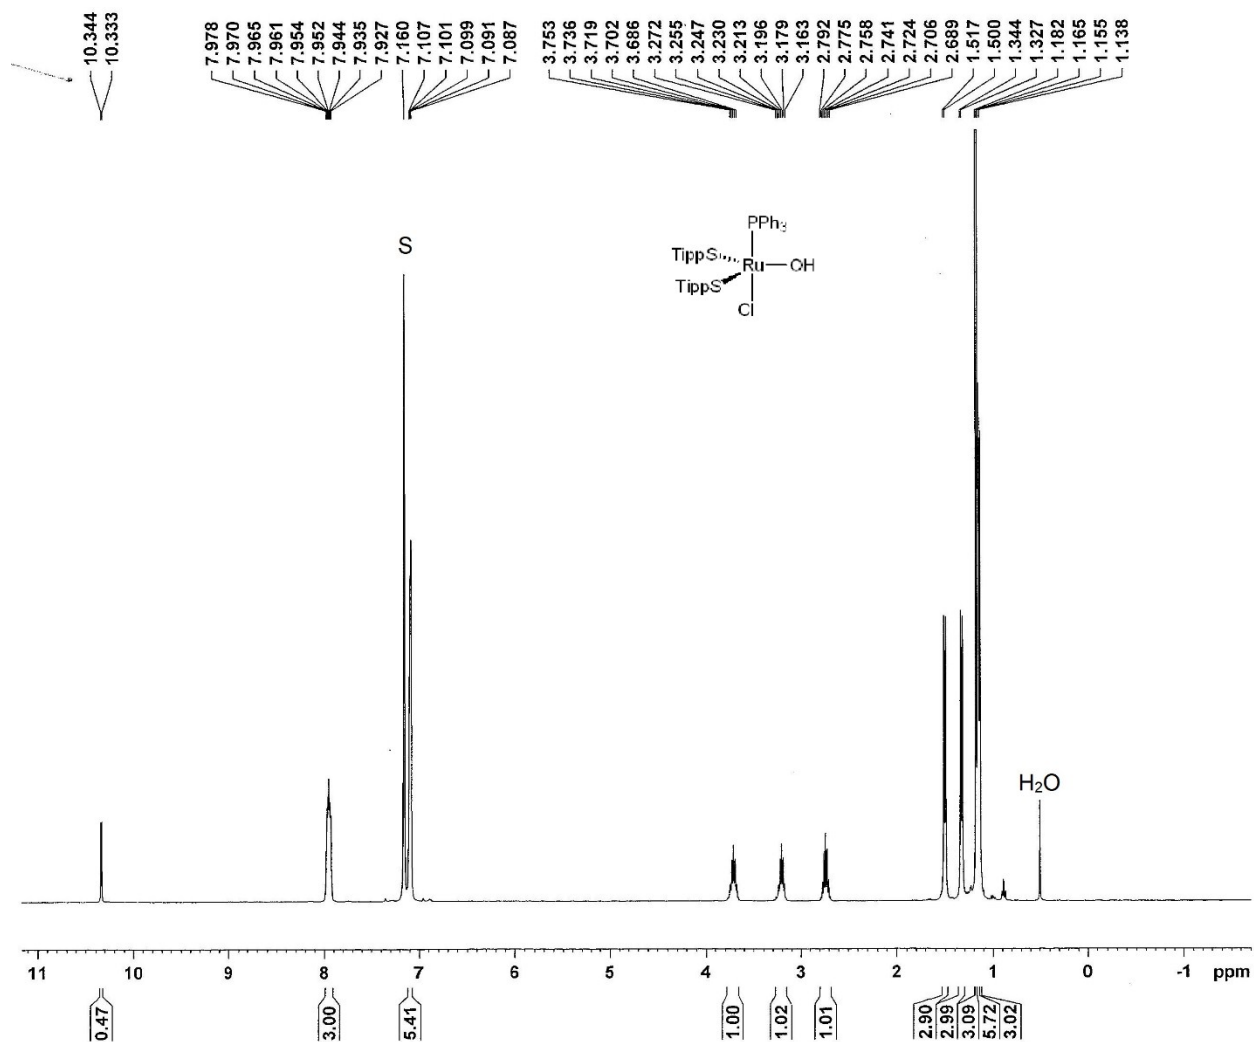

Figure S9.  $^1\text{H NMR}$  (400 MHz, 298 K,  $\text{C}_6\text{D}_6$ ) spectrum of **4** (X = impurity, S = residual solvent).

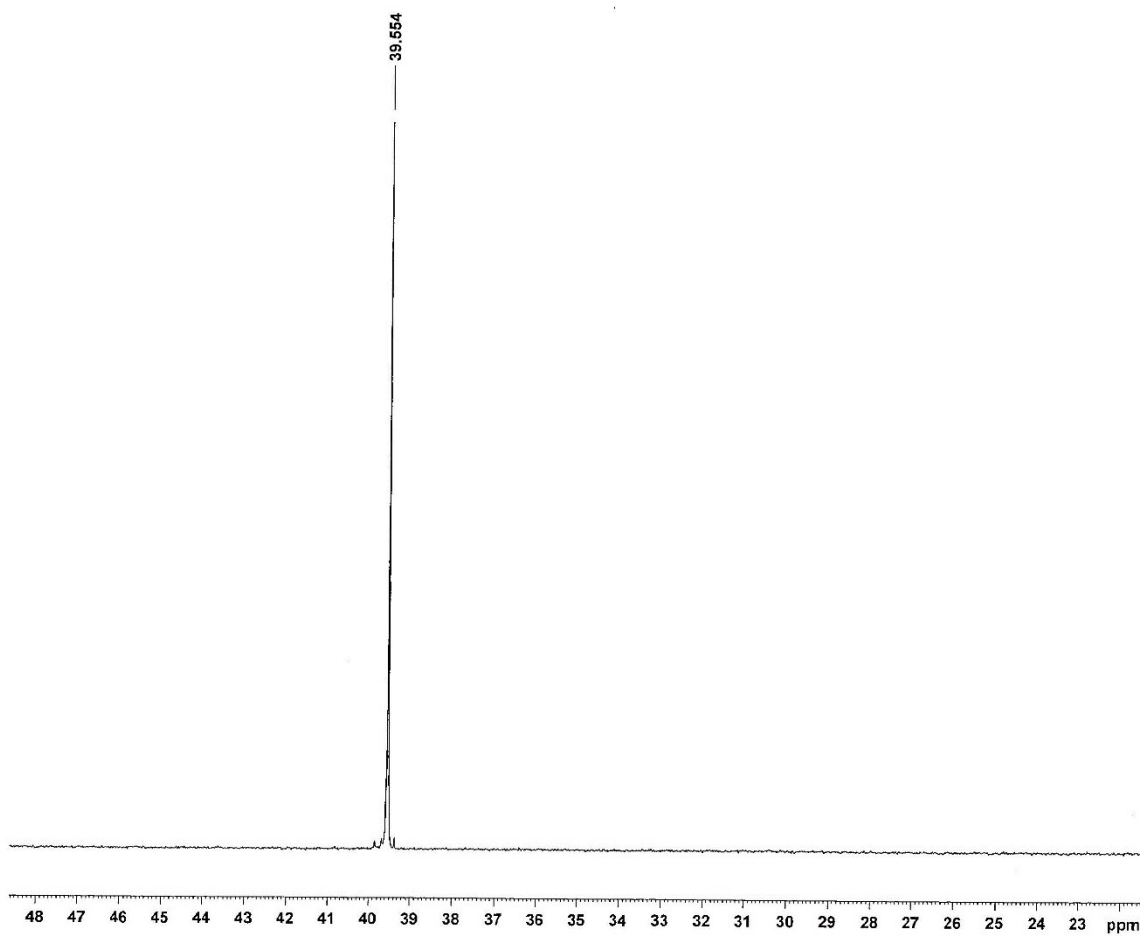

Figure S10.  $^{31}\text{P}\{^1\text{H}\}$  NMR (162 MHz, 298 K,  $\text{C}_6\text{D}_6$ ) spectrum of **4**. Figure

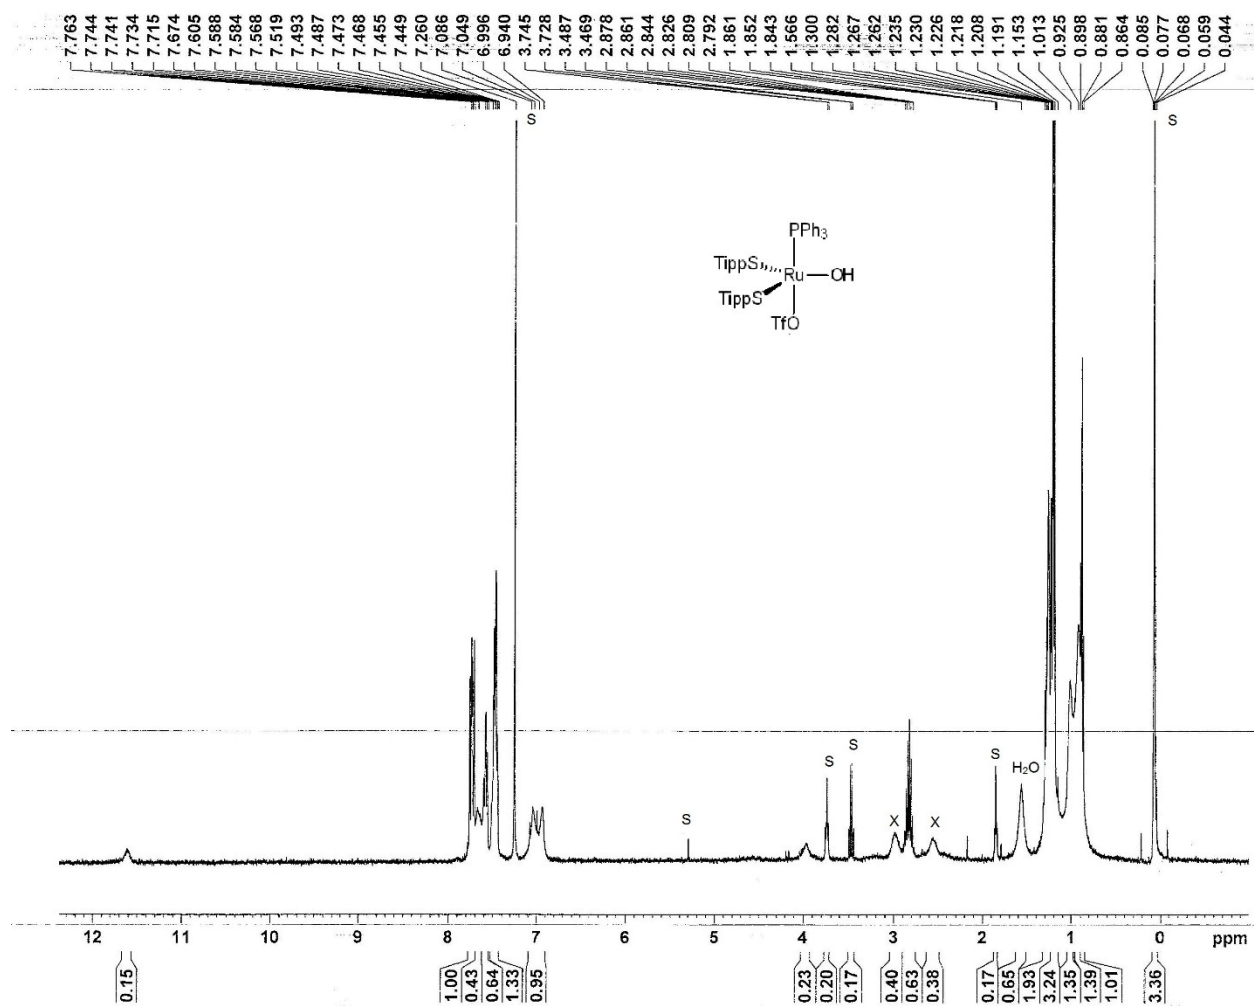

Figure S11.  $^1\text{H}$  NMR (400 MHz, 298 K,  $\text{CDCl}_3$ ) spectrum of **5** (X = impurity, S = residual solvent).

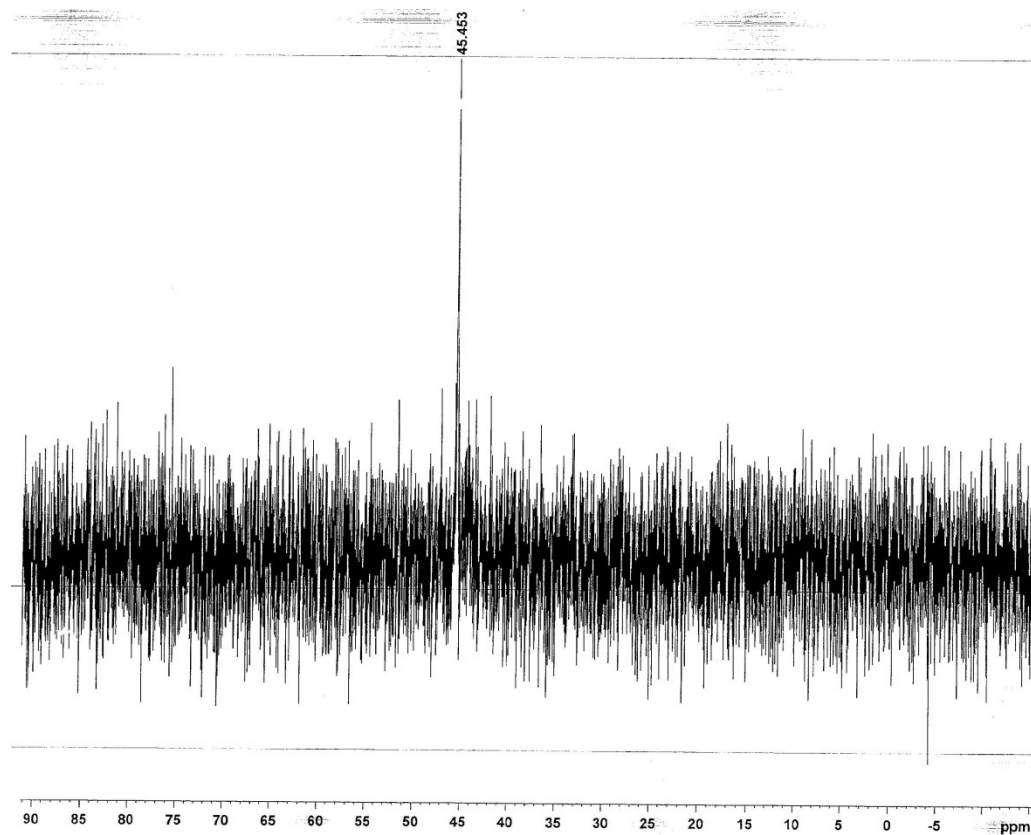

Figure S12.  $^{31}\text{P}\{^1\text{H}\}$  NMR (162 MHz, 298 K,  $\text{CDCl}_3$ ) spectrum of **5**.

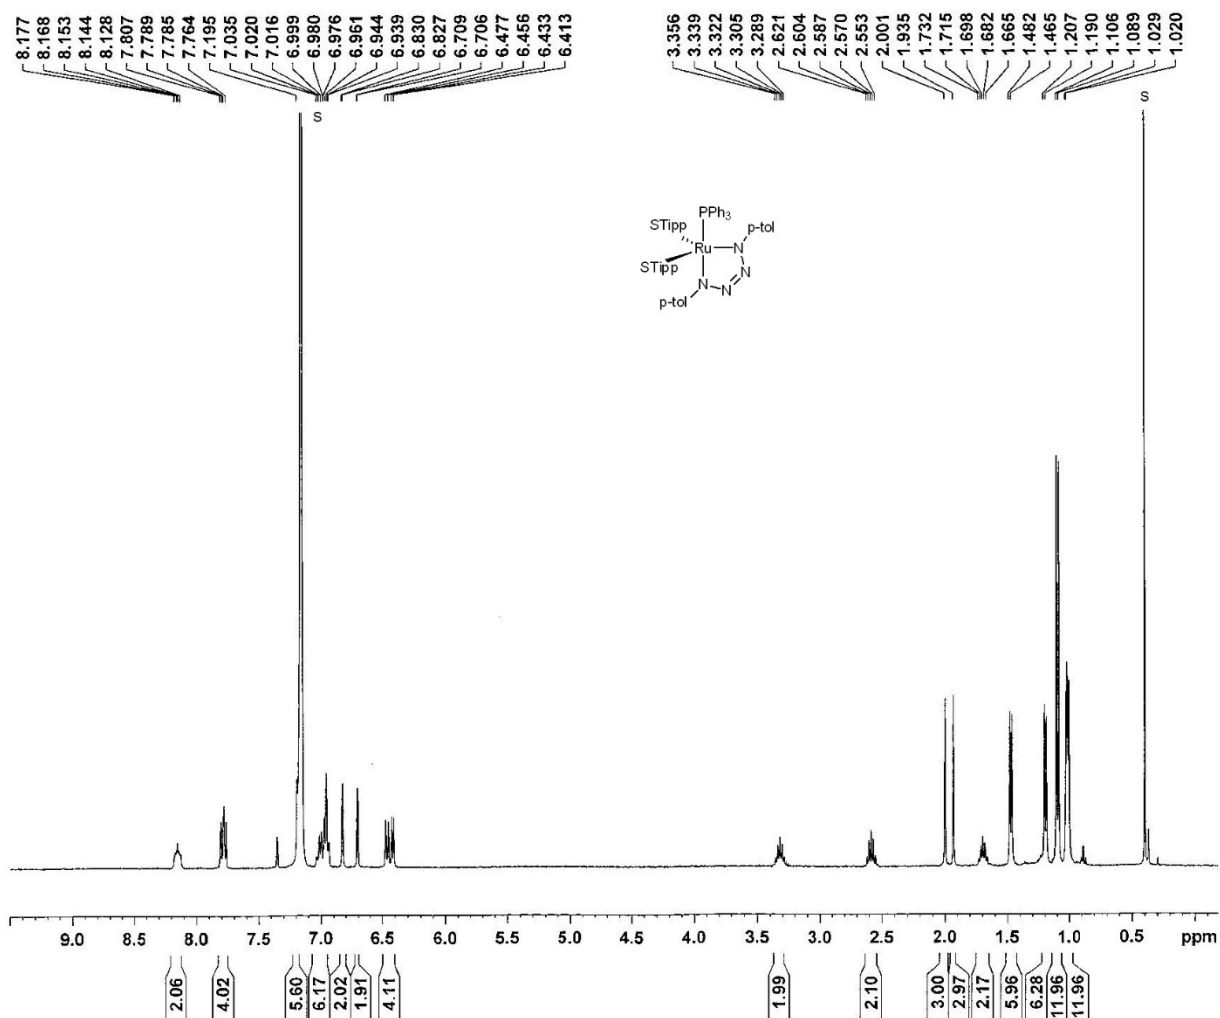

Figure S13.  $^1\text{H}$  NMR (400 MHz, 298 K,  $\text{C}_6\text{D}_6$ ) spectrum of 6 (X = impurity, S = residual solvent).

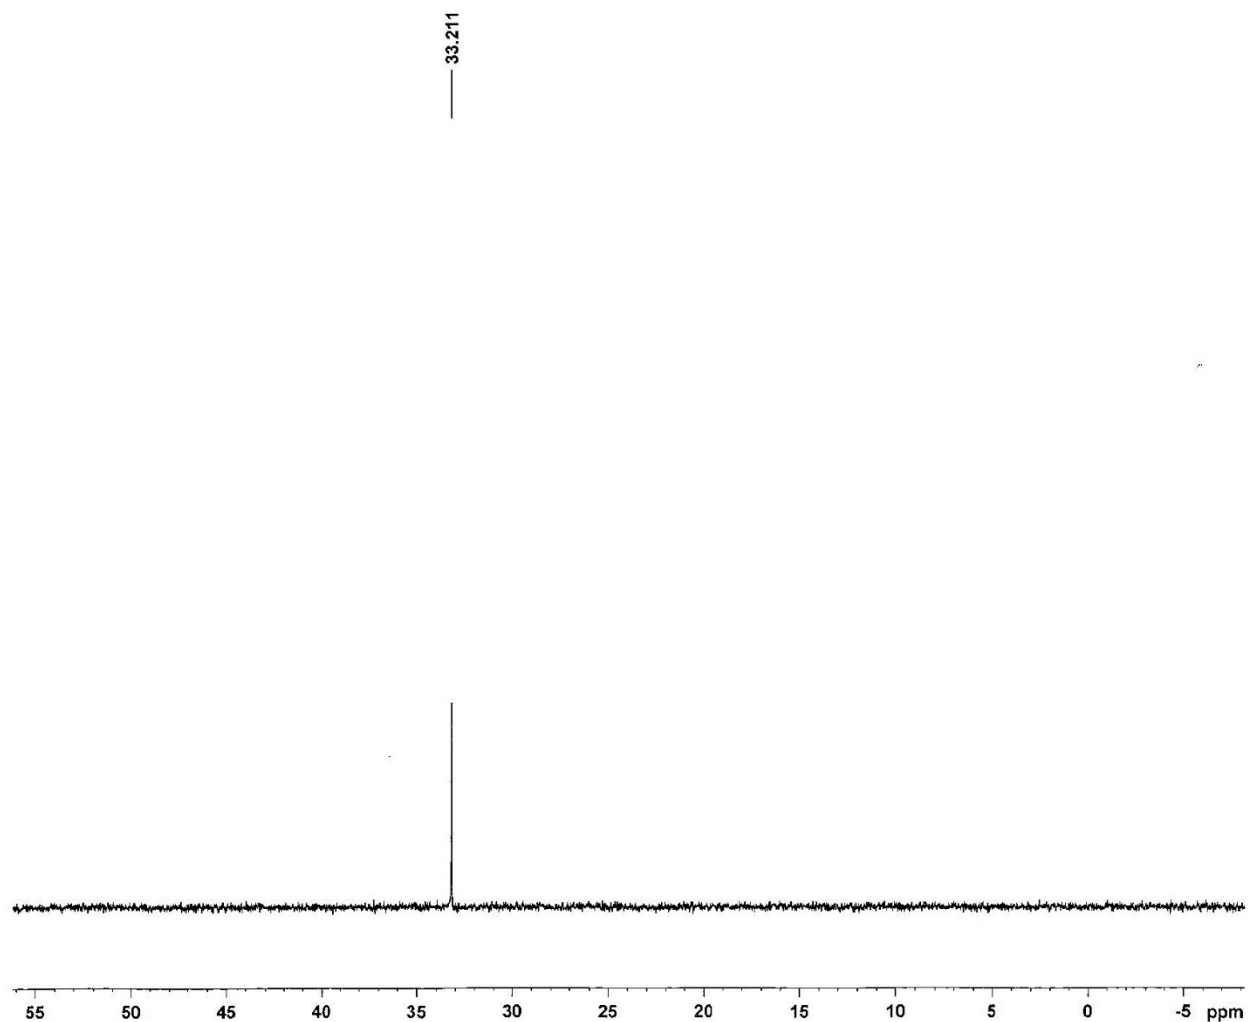

Figure S14.  $^{31}\text{P}\{^1\text{H}\}$  NMR (162 MHz, 298 K,  $\text{C}_6\text{D}_6$ ) spectrum of **6**.

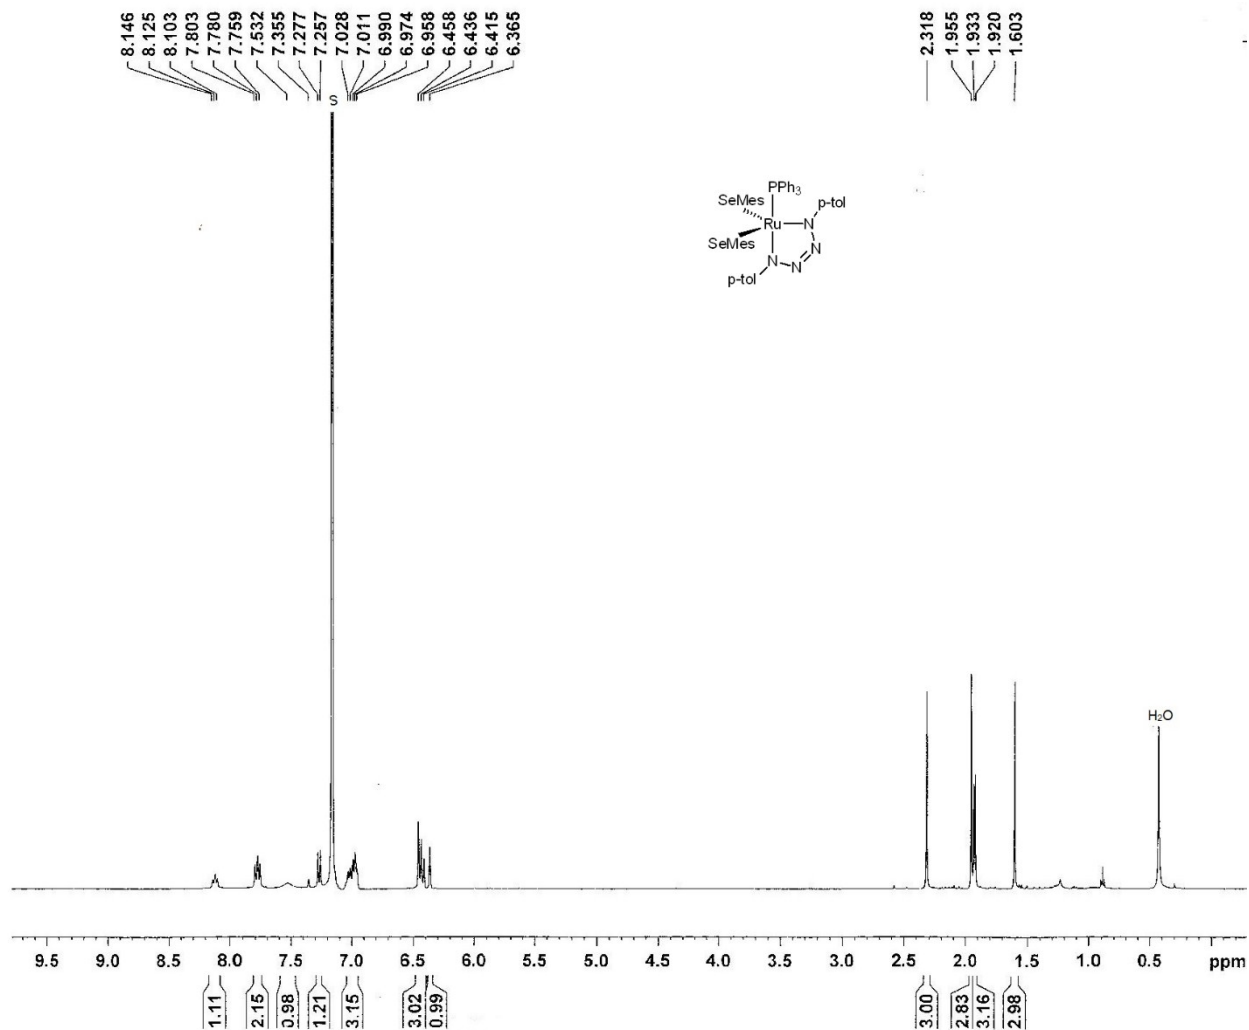

Figure S15.  $^1\text{H}$  NMR (400 MHz, 298 K,  $\text{C}_6\text{D}_6$ ) spectrum of 7 (X = impurity, S = residual solvent).

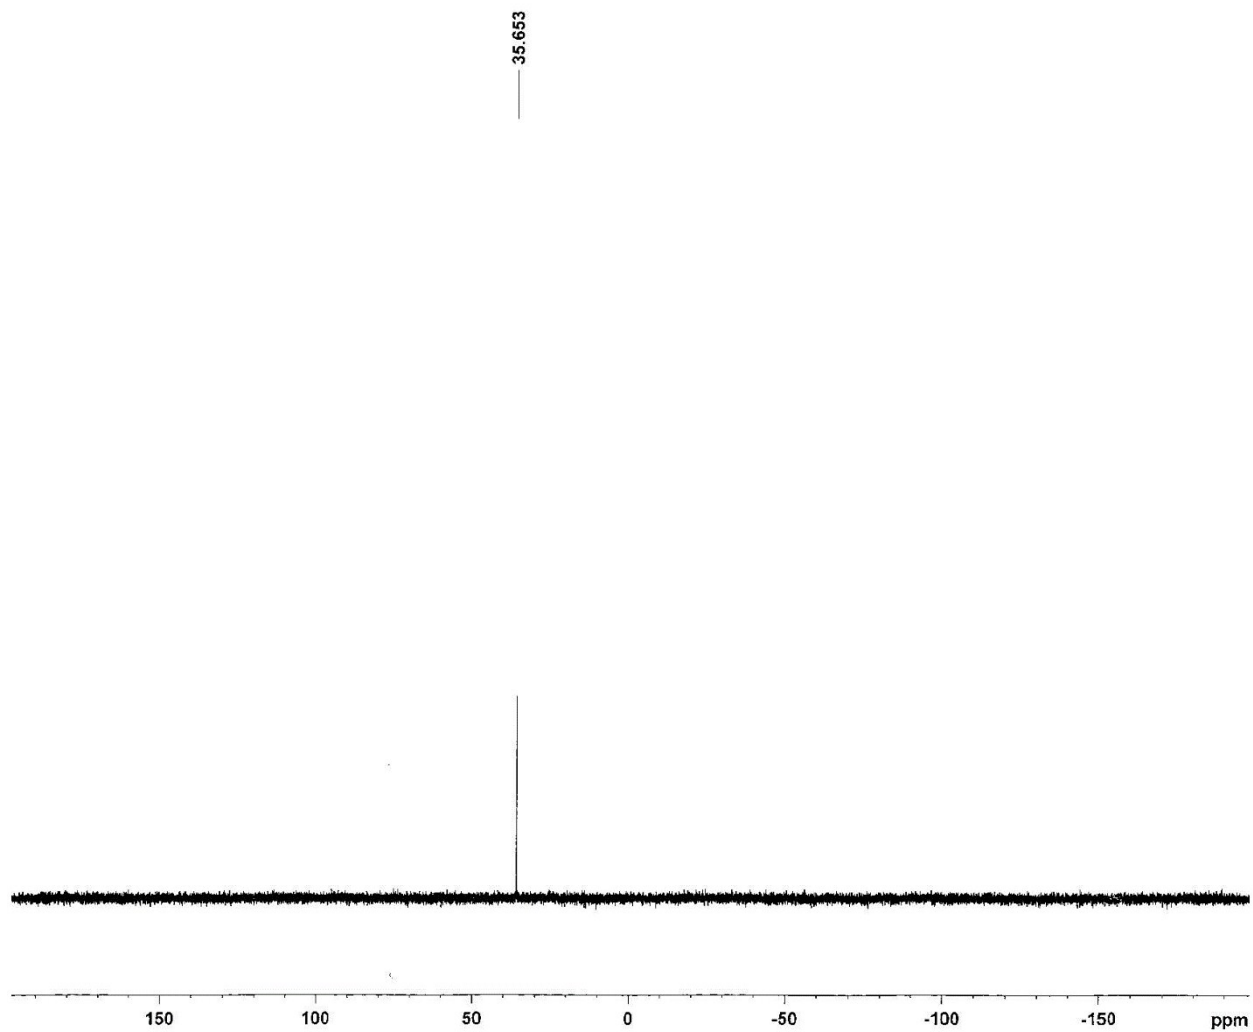

Figure S16.  $^{31}\text{P}\{^1\text{H}\}$  NMR (162 MHz, 298 K,  $\text{C}_6\text{D}_6$ ) spectrum of 7.



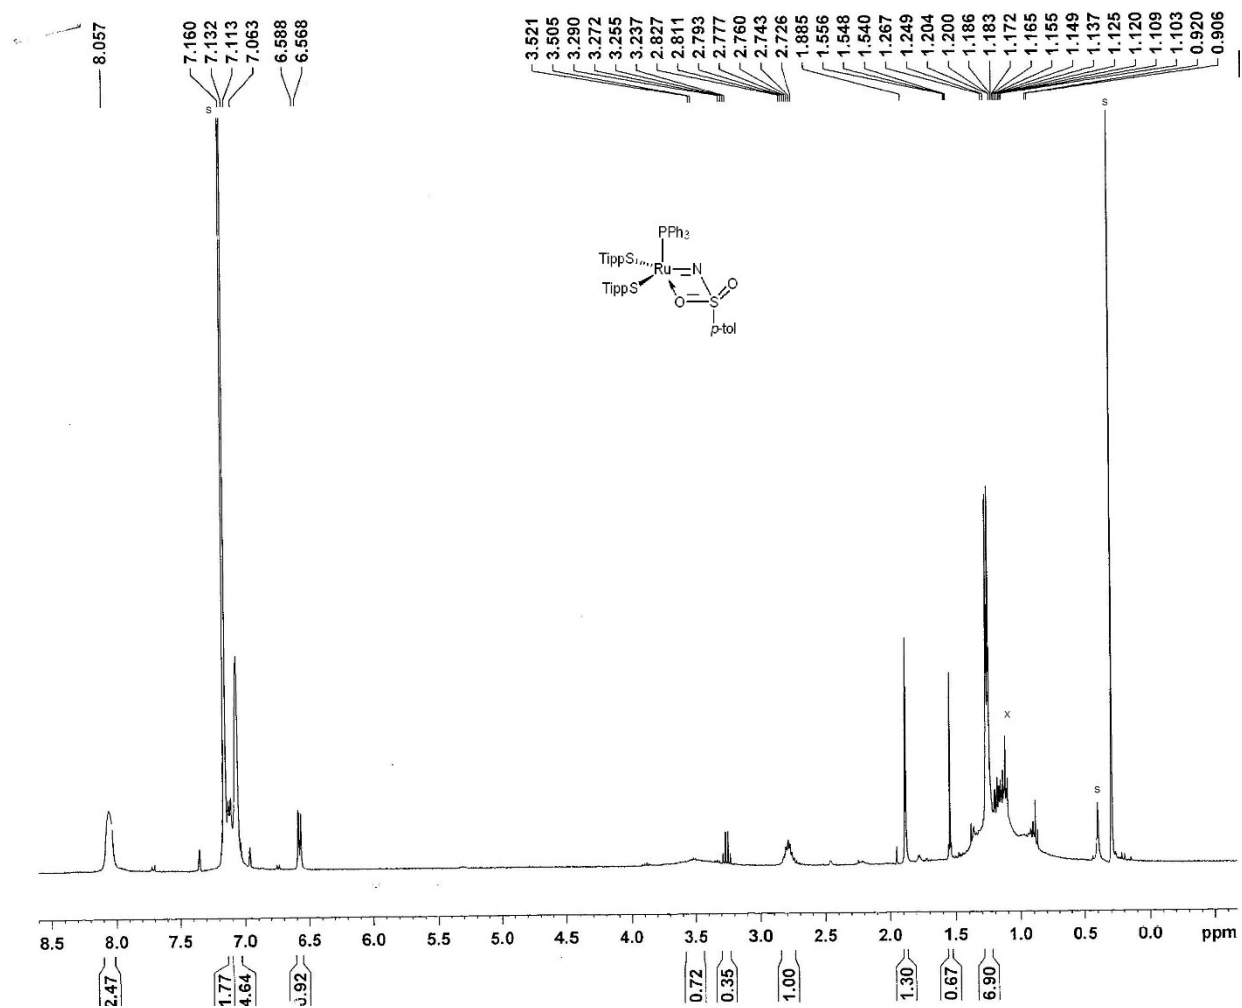

Figure S17.  $^1\text{H}$  NMR (400 MHz, 298 K,  $\text{C}_6\text{D}_6$ ) spectrum of **8** (X = impurity, S = residual solvent).

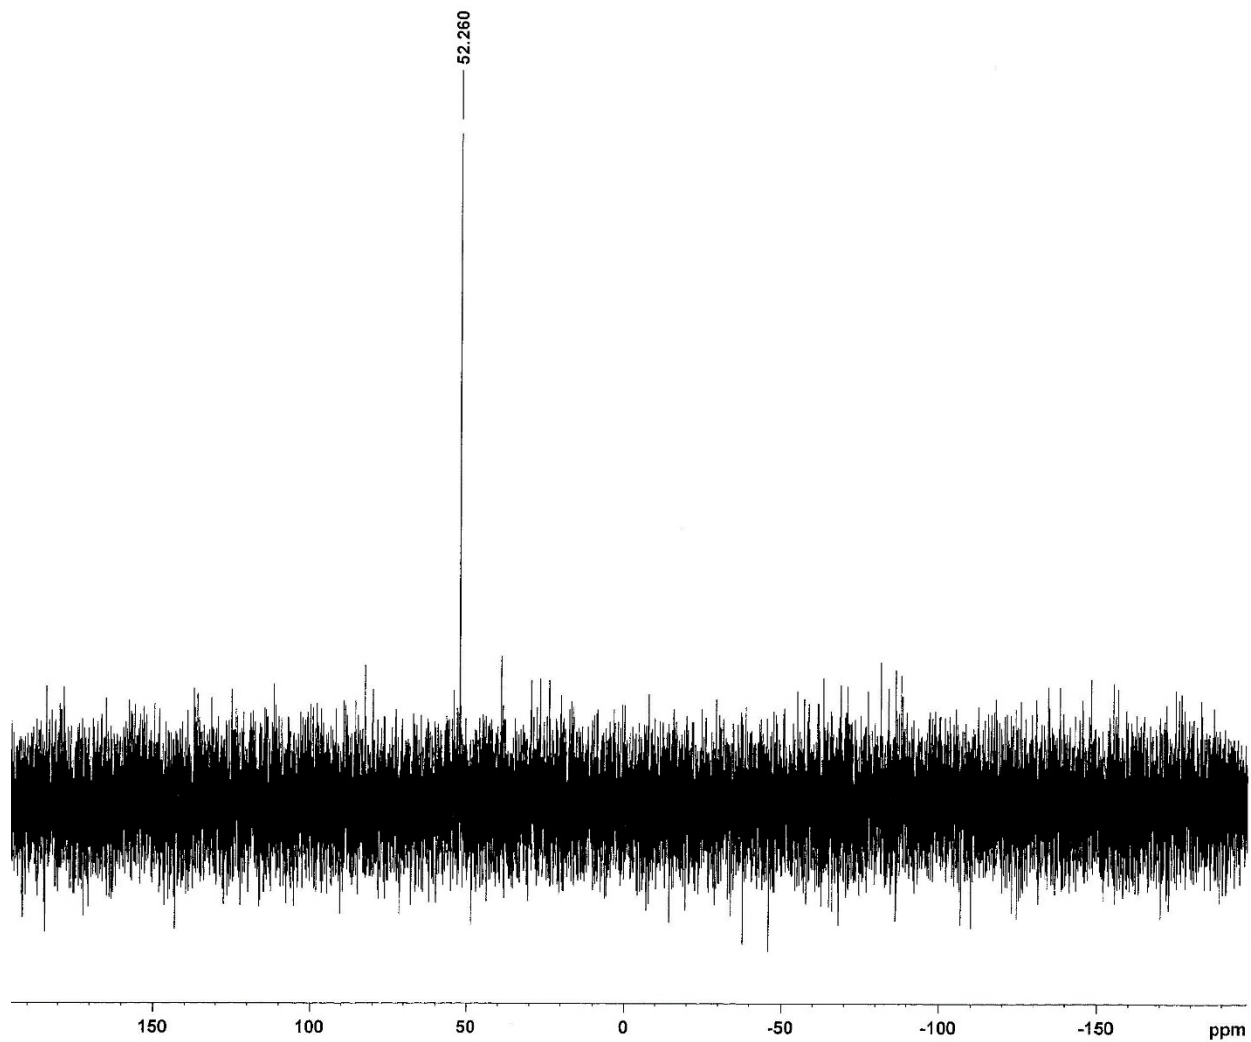

Figure S18.  $^{31}\text{P}\{^1\text{H}\}$  NMR (162 MHz, 298 K,  $\text{C}_6\text{D}_6$ ) spectrum of **8**.

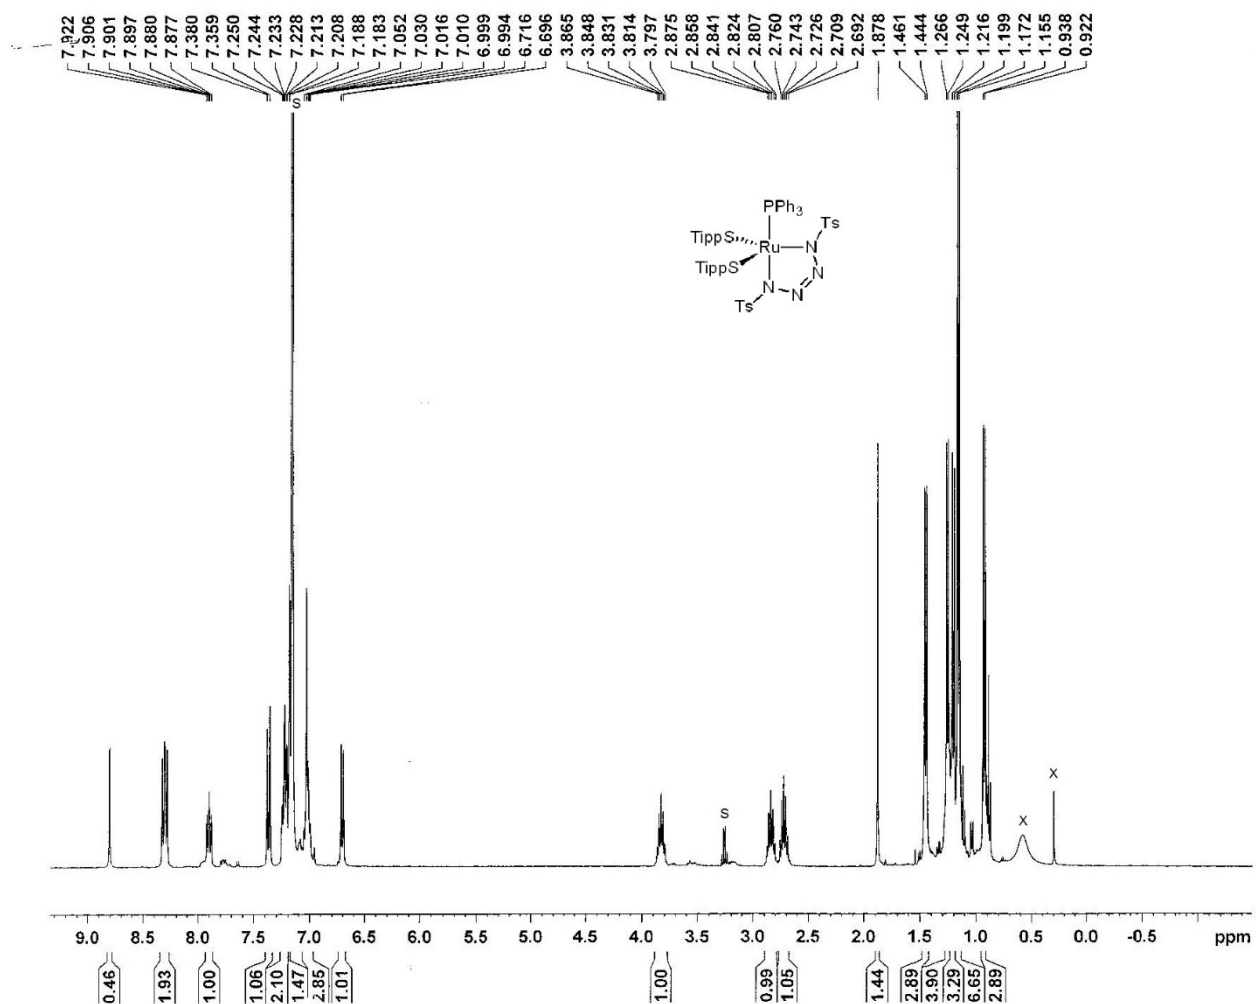

Figure S19.  $^1\text{H NMR}$  (400 MHz, 298 K,  $\text{C}_6\text{D}_6$ ) spectrum of **9** (X = impurity, S = residual solvent).

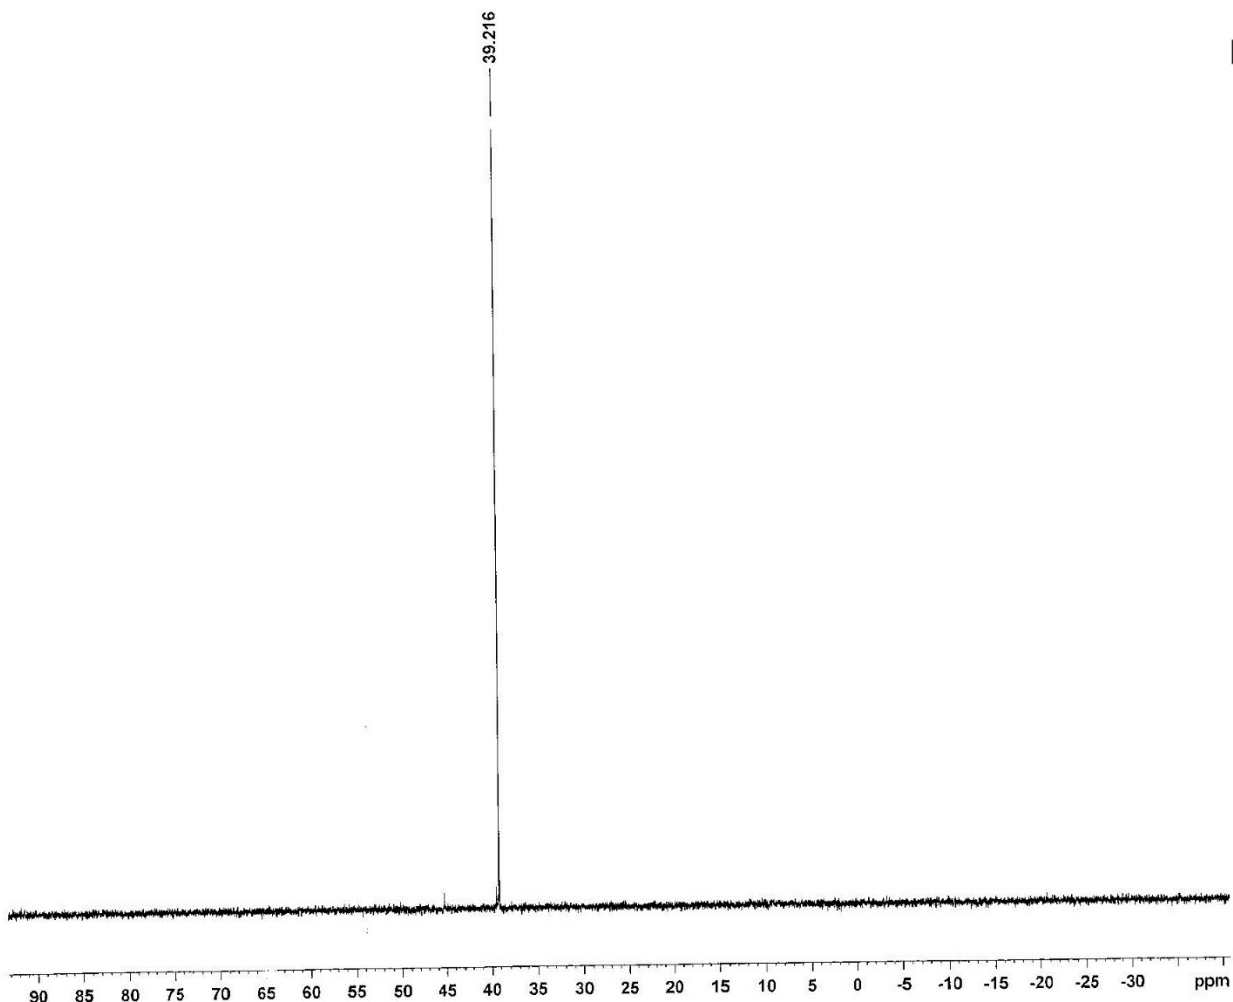

Figure S20.  $^{31}\text{P}\{^1\text{H}\}$  NMR (162 MHz, 298 K,  $\text{C}_6\text{D}_6$ ) spectrum of **9**.

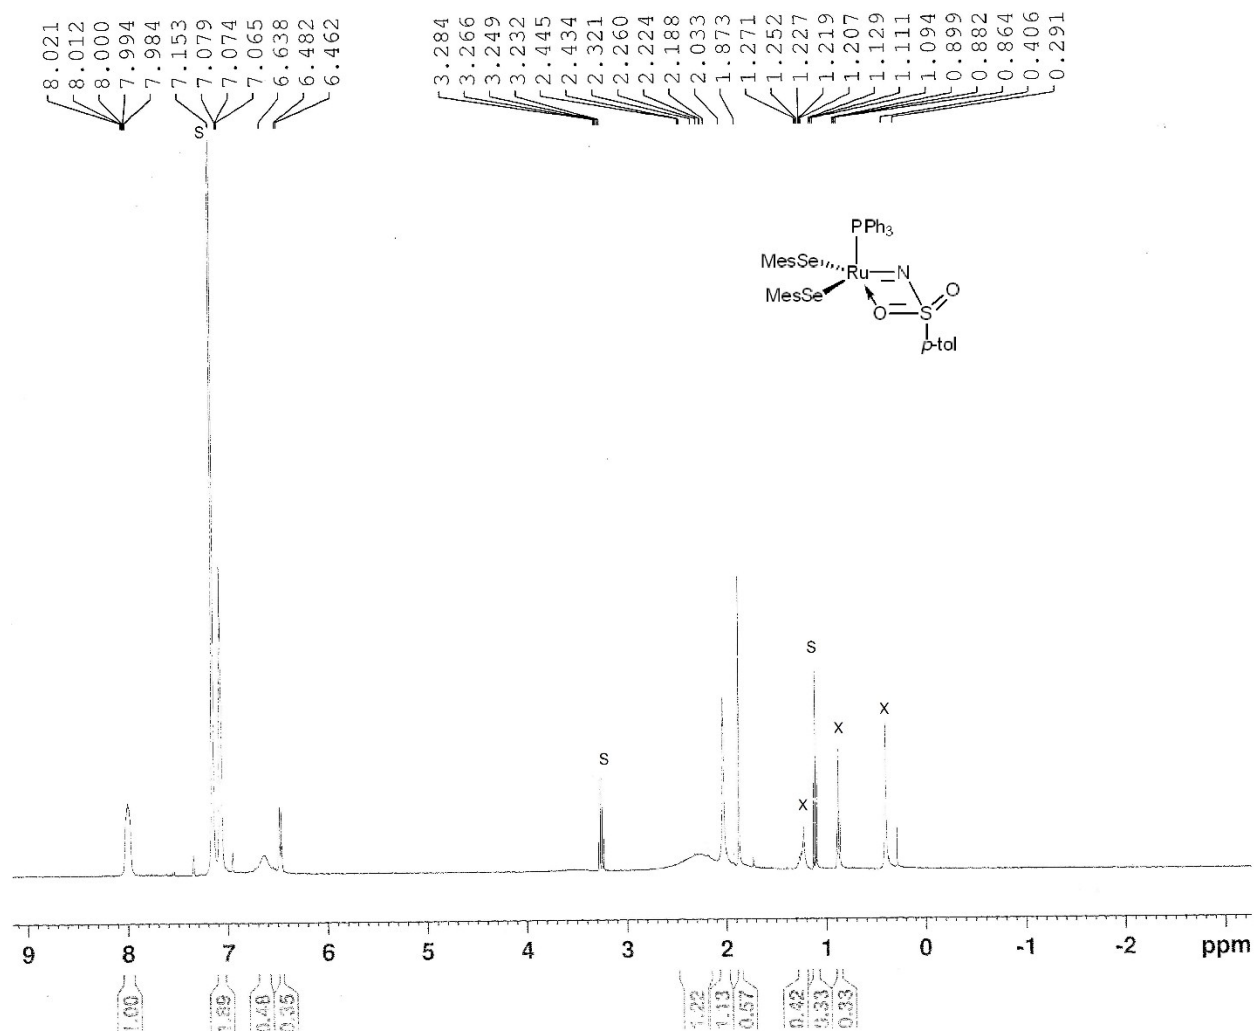

Figure S21.  $^1\text{H}$  NMR (400 MHz, 298 K,  $\text{C}_6\text{D}_6$ ) spectrum of **10** (X = impurity, S = residual solvent).

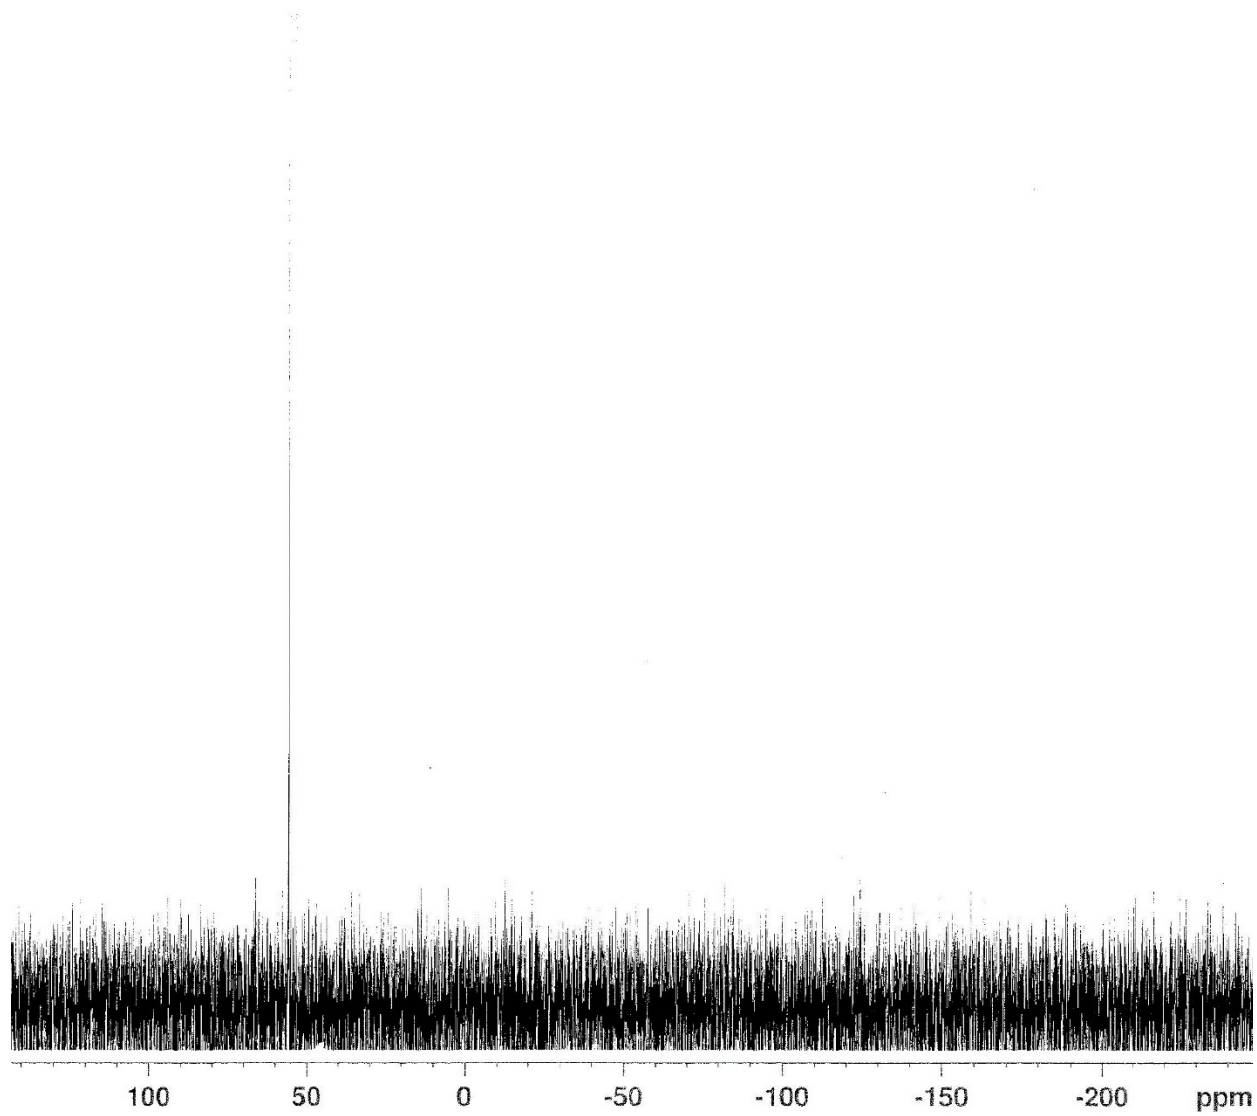

Figure S22.  $^{31}\text{P}\{^1\text{H}\}$  NMR (162 MHz, 298 K,  $\text{C}_6\text{D}_6$ ) spectrum of **10**.

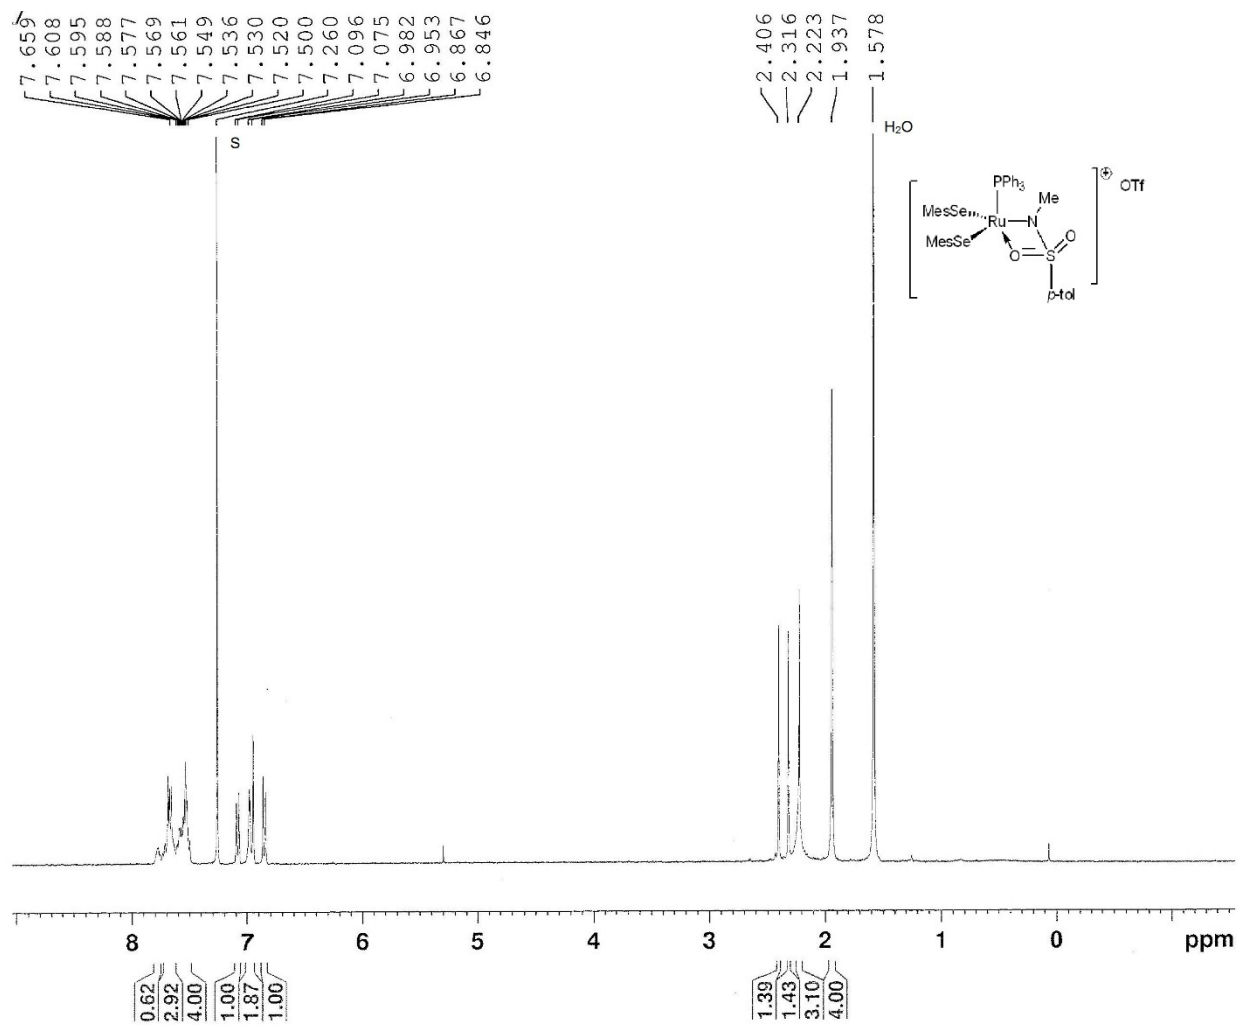

Figure S23.  $^1\text{H}$  NMR (400 MHz, 298 K,  $\text{CDCl}_3$ ) spectrum of **11** (X = impurity, S = residual solvent).

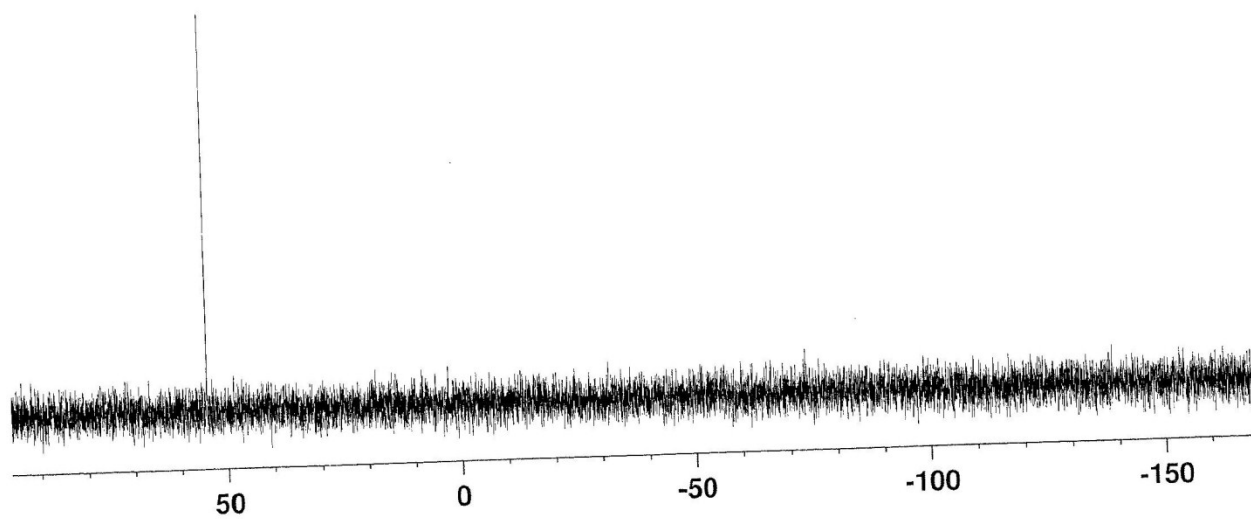

Figure S24.  $^{31}\text{P}\{^1\text{H}\}$  NMR (162 MHz, 298 K,  $\text{CDCl}_3$ ) spectrum of **11**.



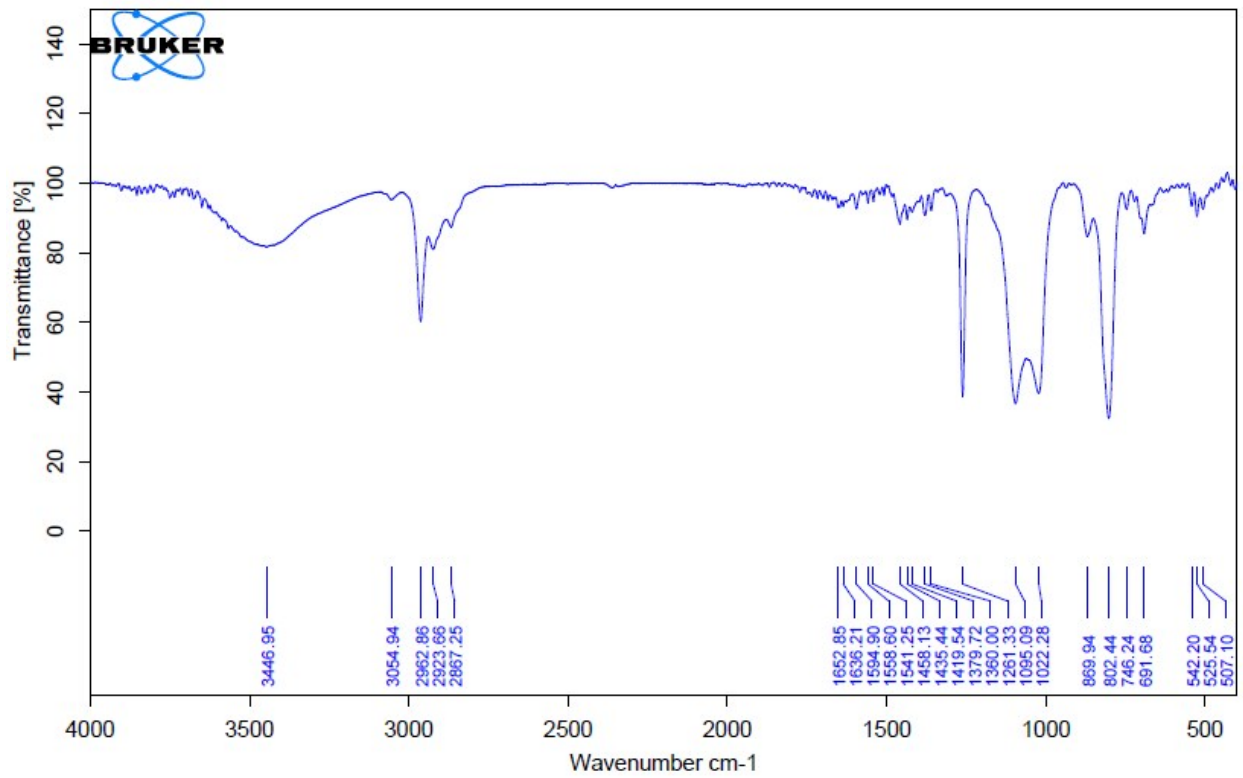

Figure S25. FT-IR spectrum of 4.

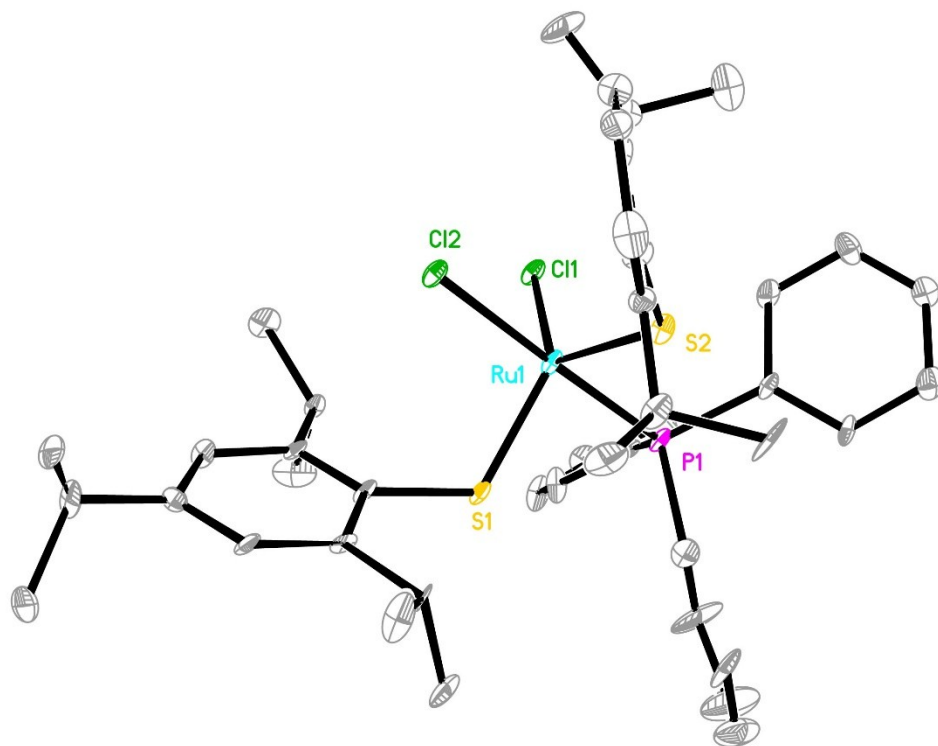

Figure S26. Preliminary crystal structure of [Ru<sup>IV</sup>(STipp)<sub>2</sub>Cl<sub>2</sub>(PPh<sub>3</sub>)] (**3**).

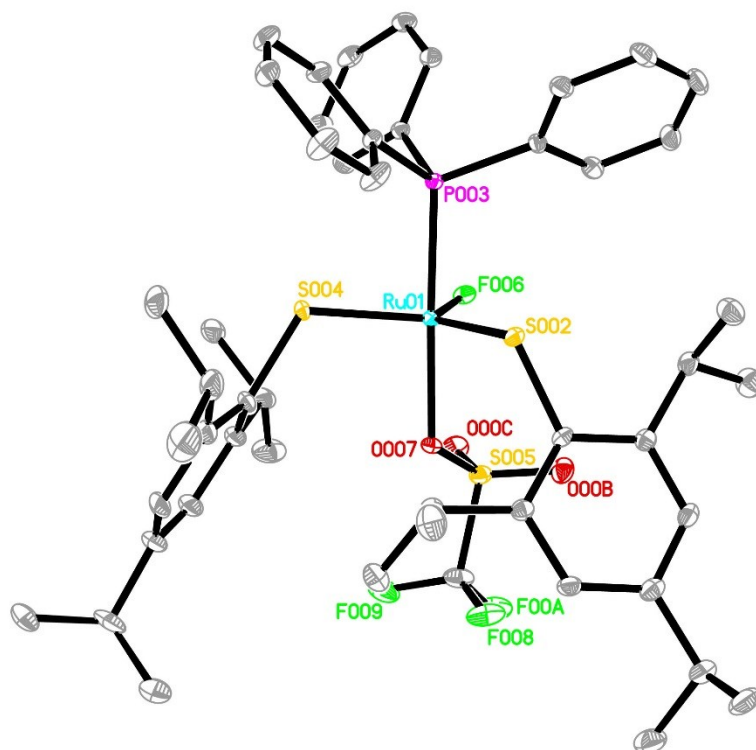

Figure S27. Preliminary crystal structure of [Ru<sup>IV</sup>(STipp)<sub>2</sub>(OH)(OTf)(PPh<sub>3</sub>)] (5).

Table S1. Crystallographic data and experimental details for **2**, **4**, **6**, **8**, **9**, **10** and **11**.

|                                                                                                       | <b>2</b>                                                         | <b>4</b>                                             | <b>6</b>                                                         | <b>8</b>                                                          | <b>9</b> ·0.25C <sub>6</sub> H <sub>14</sub> ·0.5C <sub>4</sub> H <sub>10</sub> O     | <b>10</b> ·0.75C <sub>4</sub> H <sub>8</sub> O·0.25H <sub>2</sub> O                 | <b>11</b> ·1.5CH <sub>2</sub> Cl <sub>2</sub> ·0.25H <sub>2</sub> O                              |
|-------------------------------------------------------------------------------------------------------|------------------------------------------------------------------|------------------------------------------------------|------------------------------------------------------------------|-------------------------------------------------------------------|---------------------------------------------------------------------------------------|-------------------------------------------------------------------------------------|--------------------------------------------------------------------------------------------------|
| Formula                                                                                               | C <sub>54</sub> H <sub>52</sub> P <sub>2</sub> RuSe <sub>2</sub> | C <sub>48</sub> H <sub>62</sub> ClOPRuS <sub>2</sub> | C <sub>62</sub> H <sub>75</sub> N <sub>4</sub> PRuS <sub>2</sub> | C <sub>55</sub> H <sub>68</sub> NO <sub>2</sub> PRuS <sub>3</sub> | C <sub>65.5</sub> H <sub>83.5</sub> N <sub>4</sub> O <sub>4.5</sub> PRuS <sub>4</sub> | C <sub>46</sub> H <sub>50.5</sub> NO <sub>3</sub> PRuS <sub>2</sub> Se <sub>2</sub> | C <sub>45</sub> H <sub>47</sub> F <sub>3</sub> NO <sub>5</sub> PRuS <sub>2</sub> Se <sub>2</sub> |
| Formula weight                                                                                        | 1021.88                                                          | 886.58                                               | 1072.42                                                          | 1003.32                                                           | 1259.17                                                                               | 987.39                                                                              | 1224.81                                                                                          |
| Crystal system                                                                                        | trigonal                                                         | triclinic                                            | triclinic                                                        | monoclinic                                                        | monoclinic                                                                            | triclinic                                                                           | triclinic                                                                                        |
| Space group                                                                                           | P3 <sub>2</sub>                                                  | P-1                                                  | P-1                                                              | P2 <sub>1</sub> /c                                                | P2 <sub>1</sub>                                                                       | P-1                                                                                 | P-1                                                                                              |
| <i>a</i> , Å                                                                                          | 13.3542(4)                                                       | 9.6919(3)                                            | 11.1803(5)                                                       | 20.8430(4)                                                        | 11.57442(18)                                                                          | 9.9055(3)                                                                           | 12.4019(5)                                                                                       |
| <i>b</i> , Å                                                                                          | 13.3545(4)                                                       | 14.1709(4)                                           | 14.8921(6)                                                       | 13.9235(2)                                                        | 42.0951(6)                                                                            | 14.8954(7)                                                                          | 20.0163(8)                                                                                       |
| <i>c</i> , Å                                                                                          | 22.3819(6)                                                       | 17.7259(6)                                           | 17.3032(7)                                                       | 18.7630(4)                                                        | 13.6150(3)                                                                            | 15.8159(7)                                                                          | 20.6971(8)                                                                                       |
| <i>α</i> , deg                                                                                        | 90                                                               | 78.473(3)                                            | 96.126(3)                                                        | 90                                                                | 90                                                                                    | 70.854(4)                                                                           | 76.926(3)                                                                                        |
| <i>β</i> , deg                                                                                        | 90                                                               | 82.579(3)                                            | 93.546(3)                                                        | 107.128(2)                                                        | 98.1209(18)                                                                           | 82.761(3)                                                                           | 88.118(3)                                                                                        |
| <i>γ</i> , deg                                                                                        | 120                                                              | 72.678(3)                                            | 100.986(4)                                                       | 90                                                                | 90                                                                                    | 72.261(3)                                                                           | 89.849(3)                                                                                        |
| <i>V</i> , Å <sup>3</sup>                                                                             | 3456.7(2)                                                        | 2270.91(13)                                          | 2801.9(2)                                                        | 5203.64(18)                                                       | 6567.0(2)                                                                             | 2098.80(16)                                                                         | 5001.9(3)                                                                                        |
| <i>Z</i>                                                                                              | 3                                                                | 2                                                    | 2                                                                | 4                                                                 | 4                                                                                     | 2                                                                                   | 4                                                                                                |
| <i>ρ</i> <sub>calc</sub> , g cm <sup>-3</sup>                                                         | 1.473                                                            | 1.297                                                | 1.271                                                            | 1.281                                                             | 1.274                                                                                 | 1.562                                                                               | 1.626                                                                                            |
| <i>T</i> , K                                                                                          | 100.00(10)                                                       | 220.00(10)                                           | 100.01(10)                                                       | 100.00(10)                                                        | 99.9(2)                                                                               | 100.01(10)                                                                          | 100.01(10)                                                                                       |
| <i>μ</i> , mm <sup>-1</sup>                                                                           | 2.025                                                            | 4.775                                                | 3.543                                                            | 4.156                                                             | 0.439                                                                                 | 6.156                                                                               | 7.239                                                                                            |
| <i>F</i> (000)                                                                                        | 1554.0                                                           | 932.0                                                | 1132.0                                                           | 2112.0                                                            | 2654.0                                                                                | 1001.0                                                                              | 2462.0                                                                                           |
| Total reflections                                                                                     | 21193                                                            | 12355                                                | 15645                                                            | 28996                                                             | 39783                                                                                 | 11466                                                                               | 28086                                                                                            |
| Independent reflections                                                                               | 8726                                                             | 7932                                                 | 9872                                                             | 9259                                                              | 23188                                                                                 | 7294                                                                                | 17772                                                                                            |
| <i>R</i> <sub>int</sub>                                                                               | 0.0830                                                           | 0.0171                                               | 0.0808                                                           | 0.0679                                                            | 0.0417                                                                                | 0.0231                                                                              | 0.0458                                                                                           |
| GoF <sup>a</sup>                                                                                      | 1.003                                                            | 1.002                                                | 1.001                                                            | 1.001                                                             | 1.001                                                                                 | 1.000                                                                               | 0.961                                                                                            |
| <i>R</i> <sub>1</sub> , <sup>b</sup> <i>wR</i> <sub>2</sub> <sup>c</sup> [ <i>I</i> > 2σ( <i>I</i> )] | 0.0670, 0.1105                                                   | 0.0252, 0.0625                                       | 0.0446, 0.1067                                                   | 0.0491, 0.1031                                                    | 0.0472, 0.0974                                                                        | 0.0367, 0.0947                                                                      | 0.0449, 0.0952                                                                                   |
| <i>R</i> <sub>1</sub> , <i>wR</i> <sub>2</sub> (all data)                                             | 0.1245, 0.1284                                                   | 0.0269, 0.0637                                       | 0.0552, 0.1133                                                   | 0.0715, 0.1113                                                    | 0.0557, 0.1023                                                                        | 0.0391, 0.0967                                                                      | 0.0750, 0.1070                                                                                   |

$$^a \text{GoF} = [\sum w(|F_o| - |F_c|)^2 / (N_{\text{obs}} - N_{\text{param}})]^{1/2}. \quad ^b R_1 = \sum ||F_o| - |F_c|| / \sum |F_o|. \quad ^c wR_2 = [(\sum w|F_o| - |F_c|)^2 / \sum w^2 |F_o|]$$
